## OBSERVATIONS

## Venlafaxine HCl in the Treatment of Painful Peripheral Diabetic Neuropathy

In a recent letter by Davis and Smith (1), venlafaxine HCl was reported to be effective in the symptomatic treatment of patients with painful diabetic neuropathy. This observation is in accordance with a similar finding made by us.

We administered venlafaxine HCl in 8 patients who had unremitting painful peripheral diabetic neuropathy that did not respond to conventional analgesia. All patients had type 2 diabetes and were of Greek origin. The patients' ages ranged from 49 to 80 years, and their duration of diabetes ranged from 6 to 21 years. Of these patients, 5 were men and 3 were women; 5 of the patients were being treated with oral antidiabetic agents, and 3 were on treatment with insulin. The glycemic control of each patient was good (mean HbA<sub>1c</sub> value  $7.2 \pm 1.2\%$ ).

Peripheral sensory neuropathy was present in all of them, and treatment with nonsteroidal anti-inflammatory drugs and acetaminophen was unsuccessful.

Symptoms of neuropathy included sharp, stabbing, or burning pain on the feet; numbness; and tingling. The symptoms were unremitting with nocturnal exacerbation. The vibration sense, which was examined by use of a tuning fork, was decreased, and the ankle tendon reflexes were absent in all of the patients. Other frequent causes of peripheral sensory neuropathy, such as uremia, myxedema, B<sub>12</sub> deficiency, and alcoholism, were excluded.

We tried several therapeutic regimens for the management of this common and difficult-to-treat problem. Administration of carbamazepine resulted in some benefit when given to 2 of the patients, but the drug was discontinued because of dizziness in 1 patient and because of elevation of liver enzymes (aspartate aminotransferase, alanine aminotransferase, and gamma-glutamyl-transpeptidase) in the other patient. Application of capsaicin cream was temporarily effective in 2 other patients, but the symptoms were only mildly to moderately alleviated. Administration of amitriptyline in a single dose of

25 mg, which was eventually increased to 75 mg, at bedtime was effective when given to 4 patients. The degree of pain relief was significant, but the side effects in 2 patients were intolerable. In 1 patient, amitriptyline caused sedation that interfered with the patient's ability to drive a car; in the other patient, the drug caused postural hypotension.

Finally, we administered venlafaxine HCl in a dose of 37.5 mg twice a day to all of the patients. The results were impressive, and none of the patients experienced the side effects associated with administration of amitriptyline.

Well before experiencing the antidepressant effect of the drug, the patients experienced a dramatic relief in the symptoms associated with painful peripheral neuropathy within 2–8 days after initiating treatment with venlafaxine HCl.

In 2 patients, administration of the drug resulted in nausea, but these episodes were not severe enough to warrant the cessation of treatment. Resolution of venlafaxine-associated nausea occurred rapidly in both patients, and the treatment remained uninterrupted. No serious side effects were observed. It is worth noting that venlafaxine HCl was especially effective in relieving the symptoms of diabetic neuropathy in the 3 insulin-treated diabetic patients. The patients began using insulin during only the last months of the study, and, after experiencing an improvement in glycemic control, they experienced an exacerbation of the symptoms of neuropathy. This is a well-known phenomenon. Venlafaxine HCl was dramatically effective in reducing the pain of neuropathy in this group of patients.

The mode of action of venlafaxine HCl is unknown. Venlafaxine HCl has been shown to be effective in relieving thermal hyperalgesia in rats with experimentally induced neuropathic pain (2).

Venlafaxine HCl seems to have one of the most favorable drug interaction profiles, and data indicate that it does not inhibit, or that it weakly inhibits, the activity of isoenzymes CYP2C9, CYP2D6, CYP1A2, or CYP3A3/4 (3,4). This is an important characteristic in view of the fact that type 2 diabetic patients are usually already on treatment with oral antidiabetic agents or several other drugs.

Our observations, which are in agreement with those of Davis and Smith (1), reinforce their suggestion that venlafaxine HCl may be useful in the treatment of painful peripheral diabetic neuropathy.

JOHN A. KIAYIAS, MD  
EUGENIA D. VLACHOU, RN, MSC  
ELLI LAKKA-PAPADODIMA, MD

From the Department of Endocrinology and Metabolism, Athens Polyclinic Hospital, Athens, Greece.

Address correspondence to John A. Kiayias, MD, Papadiamantopoulou 26 St., Athens, 11528 Greece.

## References

1. Davis JL, Smith RL: Painful peripheral diabetic neuropathy treated with venlafaxine HCl extended release capsules (Letter). *Diabetes Care* 22:1909–1910, 1999
2. Lang E, Hord AH, Denson D: Venlafaxine HCl (Effexor) relieves thermal hyperalgesia in rats with an experimental mononeuropathy. *Pain* 68:151–155, 1996
3. Ereshefsky L: Drug-drug interactions involving antidepressants: focus on venlafaxine. *J Clin Psychopharmacol* 16:37–50, 1996
4. Rudolph RL, Derivan AT: The safety and tolerability of venlafaxine HCl: analysis of the clinical trials database. *J Clin Psychopharmacol* 16:54–59, 1996

## Bilateral Diabetic Infarction of the Anterior Tibial Muscle

Diabetic syndromes in which the muscles, rather than peripheral nerves, are the primary sites of pathology are rare. Some studies have identified the muscles of the thigh (1–3) and a very few studies have identified the muscles of the leg (4–7) as sites of infarctions, each sparing the anterior tibial muscle, which is more frequently involved in mechanically induced compartment compression syndromes (8). We are reporting on a 71-year-old woman with poorly controlled type 2 diabetes suffering from bilateral isolated diabetic infarctions of the anterior tibial muscles, occurring within an interval of 7 months and confirmed by magnetic resonance imaging (MRI). Six weeks before admission, she had suddenly experienced pain, local tenderness, and hypesthesia of the right leg without any previous physical exercise or trauma. There was no reported fever, swelling of the leg, or associated local erythema, but there was some numbness and paresthesia of the anterolateral part of the right leg. The pain worsened over the subsequent 3 weeks. On examination, the patient was afebrile but in pain. Muscle

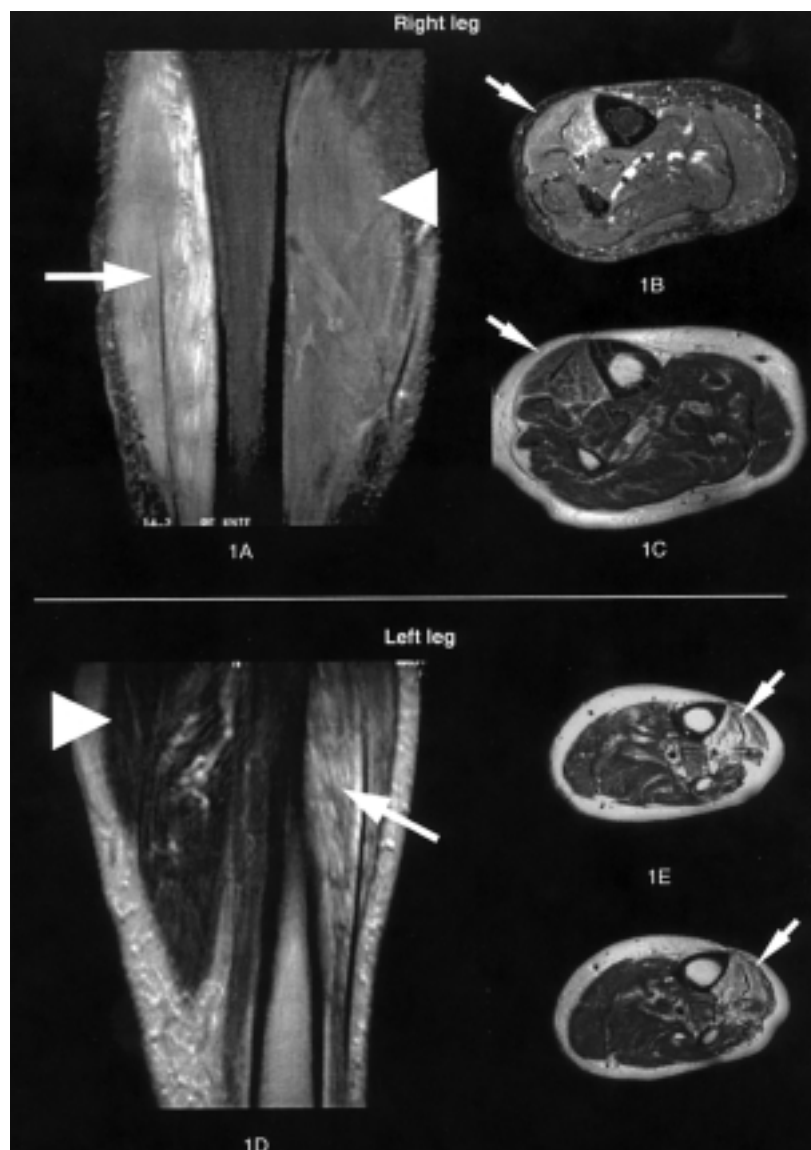

**Figure 1**—Sagittal MRI of the right and left lower leg (1A, 1D). Inversion recovery images with fat signal suppression reveal high water content of the anterior tibial muscle (long arrows), suggestive of subacute infarction, while signal of the gastrocnemius muscle (arrowheads) is normal. The corresponding axial slices 10 cm below the knee demonstrate signal abnormality of the anterior tibial muscle (short arrows), while the muscles of the peroneal group and gastrocnemius appear normal (1B: inversion recovery MRI; 1C, 1E: long T2-weighted MRI).

strength of the right lower limb was normal with the exception of paretic dorsal extension of the foot (grade 4 Medical Research Council [MRC]). She was unable to walk on her heels. Tendon reflexes were normal in the arms and hyporeactive in the knees and ankles. There was hyperpathia to tactile stimuli and paresthesia in the distal part of the anterolateral right leg. Pinprick and light touch sensation was attenuated in the same area. All peripheral arterial pulses were normal. There was no significant difference between the maximal circumferences of

both legs (<2 cm), but there was some mild bilateral ankle edema. The fasting blood glucose was 147 mg/dl, the HbA<sub>1c</sub> concentration was 6.7% (normal <5.7%), and the C-peptide level was 1.43 mmol/l (normal <0.99 mmol/l). The white blood cell count was 7,500 cells/mm<sup>3</sup> with a normal differential. The erythrocyte sedimentation rate was 33 mm/h and the C-reactive protein 2.0 mg/l (normal <2.0 mg/l). Repeated levels of creatine kinase, coagulation tests, and creatinine levels were normal. Cerebrospinal fluid showed normal protein content and cell

count. Standard motor nerve conduction and F-wave studies of bilateral deep peroneal and tibial nerves were normal. Sensory nerve conduction studies of both sural nerves showed reduced action potential amplitudes and normal nerve conduction velocities. Concentric needle electromyography (EMG) of the right anterior tibial muscle displayed severe fibrillations and positive sharp waves (3+ on a scale from 0 to 4+). In contrast, there were only a few questionable fibrillations in the extensor hallucis longus muscle and posterior tibial muscle, and no pathologic spontaneous activity in the peroneus longus, rectus femoris, vastus medialis, gastrocnemius, gluteus medius, and adductor longus muscles. Motor unit potentials of the anterior tibial muscle were slightly enlarged. The follow-up EMG examination, 8 days later, did not show any significant change in the distribution of the spontaneous activity, which was still very prominent in the anterior tibial muscle and at this time not present in the posterior tibial muscle. The plain X-ray of the leg showed no skeletal lesions. B-mode sonography of the anterolateral leg muscles and Doppler sonography and duplex scanning of the lower-limb arteries were normal. The MRI of the lumbar spine was normal. The MRI of the right leg showed high signal intensity of the anterior tibial muscle (Fig. 1C), while all other peroneal muscles, as well as the gastrocnemius muscle appeared with normal signals in the long T2-weighted images. No abnormalities could be detected in the other tissues such as nerves, bones, or soft tissues. In T1-weighted images, before and after contrast enhancement, no significant signal abnormalities were present. Inversion recovery MRI techniques were applied to differentiate between the fat and water contents of the muscle structure by using delay times for the inversion pulse producing fat and water signal suppression. These images revealed a normal fat distribution but an increased net-water content of the anterior tibial muscle (Fig. 1A, 1B).

With analgesic therapy, the symptoms gradually improved until they completely resolved after 7 weeks. However, 7 months later, the patient was readmitted because of similar pain and tenderness of the anterolateral left leg. On admission, she was unable to walk on her heels, and dorsal extension of the foot was grade 3 MRC on the left and 4+ MRC on the right. Hyperpathia to tactile stimuli and paresthesia of the anterolateral aspect of the left leg were

also found. The patient's HbA<sub>1c</sub> was elevated to 7.9% (normal <5.7%), whereas other routine laboratory tests were normal. The EMG of the left anterior tibial muscle displayed moderate fibrillations and positive sharp waves (2+ on a scale from 0 to 4+), while there was no pathologic spontaneous activity in neighboring muscles. Control EMG of the right anterior tibial muscle showed enlarged polyphasic motor unit potentials with no signs of spontaneous activity and a severely disrupted interference pattern. This time, MRI scans of the left leg showed isolated high signal intensity changes of the left anterior tibial muscle in the inversion recovery (Fig. 1D) and T2-weighted images (Fig. 1E).

In our patient with inadequately controlled diabetes, muscle infarction was at both times suggested by the acute onset of localized pain in the anterolateral leg. Several weeks after onset, EMG revealed profuse pathologic spontaneous activity confined to the anterior tibial muscles. Standard motor conduction studies of lower-limb nerves were normal, so that a mononeuropathy of the deep or common peroneal nerve was unlikely, whereas sensory nerve conduction studies were suggestive of mild sensory polyneuropathy. Laboratory investigations of serum, including creatine-kinase and cerebrospinal fluid, gave no indication of ongoing inflammation. In the absence of a history of previous trauma or excessive exercise, a mechanically induced anterior compartment syndrome of the leg with increased tissue pressure resulting in ischemia seemed unlikely. Also, typical features of anterior compartment syndrome, such as involvement of the anterior tibial muscle and the peroneal muscles, swelling of the leg and an electrically silent EMG (8), were absent in our patient. The MRI suggested an isolated lesion of both anterior tibial muscles, 4 and 6 weeks after onset of symptoms. There was increased signal intensity in long T2-weighted images and fat and water-suppression inversion-recovery sequences, thus indicating an increased net water content of the anterior tibial muscle. These findings were the morphological correlate of subacute infarction, i.e., the muscular tissue was beyond the stage of contrast enhancement but had not yet reached the chronic stage with formation of fatty streaks or scar tissue, as described in several histopathological studies (1,6). We did not supplement the imaging results by muscle biopsy in order to limit focal muscular

damage in accordance with other authors (3). Clinical examination and ultrasound of the leg arteries failed to demonstrate large vessel occlusion. Usually, the anterior tibial muscle is supplied by 3 or 4 branches of the anterior tibial artery (9) that do not regularly show up on angiography. We assume that they must have been occluded in our patient, as in previous autopsy studies in patients with diabetic muscle infarction, extensive atherosclerosis of small muscular and intramuscular arteries has been reported (6). The sensory abnormalities had to be summarized under a mild peripheral sensory polyneuropathy as indicated by the bilaterally low tendon reflex activity in the lower limbs and abnormalities of sensory nerve conduction.

In summary, from the clinical history and examination, the electrodiagnostic findings, and, in particular, the findings of MRI, we concluded that our patient suffered from diabetic muscle infarction of the anterior tibial muscles. According to the literature, a contralateral recurrence is not rare (6). Recent articles included patients with diabetic muscle infarctions of the legs and all involved the calves, directing attention from the thigh to other muscular regions as potential sites of infarction (4–7). However, to the best of our knowledge, this is the first report to describe isolated bilateral diabetic infarctions of the anterior tibial muscles.

KONSTANTINOS SPENGOS, MD  
JOHANNES C. WÖHRLE, MD  
JOHANNES BINDER, MD  
ANDREAS SCHWARTZ, MD  
MICHAEL HENNERICI, MD

From the Department of Neurology, Universitätsklinikum Mannheim, University of Heidelberg, Mannheim, Germany.

Address correspondence to Johannes C. Wöhrle, MD, the Department of Neurology, Universitätsklinikum Mannheim, University of Heidelberg, Theodor Kutzer Ufer, D-68135 Mannheim, Germany. E-mail: woehrle@neuro.ma.uni-heidelberg.de.

## References

1. Barohn RJ, Kissel JT: Case-of-the-month: painful thigh mass in a young woman: diabetic muscle infarction. *Muscle Nerve* 15: 850–855, 1992
2. Scully RE, Mark EJ, McNeely WF, Ebeling SH, Phillips LD: Case records of the Massachusetts General Hospital: weekly clinicopathological exercises. Case 29-1997: a 54-year-old diabetic woman with pain and swelling of the leg. *N Engl J Med* 337:839–845, 1997

3. Keller DR, Erpelding M, Grist T: Diabetic muscular infarction: preventing morbidity by avoiding excisional biopsy. *Arch Intern Med* 157:1611–1617, 1997
4. Umpierrez GE, Stiles RG, Kleinbart J, Krendel DA, Watts NB: Diabetic muscle infarction. *Am J Med* 101:245–250, 1996
5. Van Slyke MA, Ostrov BE: MRI evaluation of diabetic muscle infarction. *Magn Reson Imaging* 13:325–329, 1995
6. Chester CS, Banker MD: Focal infarction of muscle in diabetics. *Diabetes Care* 9:623–630, 1986
7. Nunez-Hoyo M, Gardner CL, Motta AO, Ashmead JW: Skeletal muscle infarction in diabetes: MR findings. *J Comput Assist Tomogr* 17:986–988, 1993
8. Shields RW Jr, Root KE, Wilbourn AJ: Compartment syndromes and compression neuropathies in coma. *Neurology* 36: 1370–1374, 1986
9. Lang J, Wachsmuth W: Bein und Statik. In: *Praktische Anatomie. Bein und Statik*. Berlin: Springer-Verlag, 1972, p. 311–313

## Function of Pancreatic Islets Isolated From a Type 1 Diabetic Patient

In type 1 diabetes, the progressive autoimmune destruction of the pancreatic  $\beta$ -cells leads to insulin deficiency with reduced or absent response to glucose and nonglucose stimuli. An additional hormonal defect involves glucagon secretion. This includes loss of glucose-induced suppression of glucagon secretion and exaggerated increase of glucagon in response to stimuli such as arginine infusion and a protein meal. It can be corrected by restoration of insulin levels. Not surprisingly, the information on insulin and glucagon secretion in human type 1 diabetes has been obtained almost exclusively from in vivo studies. To our knowledge, only 1 article has been published on the function of isolated type 1 diabetic islets (1). In that case, pre-proinsulin mRNA and insulin content, as well as insulin response, were evaluated from isolated islets at the clinical onset of disease. The authors found that, although markedly reduced,  $\beta$ -cells were still present, which showed a disproportionate impairment of insulin release ability.

Our laboratories are involved in the preparation and characterization of islets of Langerhans from the pancreases of large

mammals and people (2,3). We received the pancreas of P.E., a young type 1 diabetic patient, who was a multiorgan donor, and had died accidentally, 8 months after the diagnosis of type 1 diabetes. This provided us the unique opportunity to study some of the functional properties of the islets isolated from a type 1 diabetes pancreas, at a few months from clinical onset of disease.

P.E. was a 14-year-old type 1 diabetic girl. Eight months before the car accident that caused her death, she had been admitted to an emergency medicine clinic because of a coma of unknown origin, and the diagnosis of diabetic ketoacidosis was soon made. After a full recovery, she was followed by a pediatric diabetologist, who confirmed the diagnosis of type 1 diabetes by demonstrating the presence of positivity for HLA-DR3, high titer of islet cell antibody, anti-GAD, and anti-IA2 antibodies, and low levels of plasma C-peptide. Diabetes control was maintained fair ( $HbA_{1c}$  levels  $<8\%$ ) by  $\sim 0.4$  U/kg body wt of insulin, given daily through 3 separate injections. After the car accident, and after brain death was confirmed, her parents agreed to organ donation.

The islets were prepared in the laboratory in Pisa, Italy, by collagenase digestion and density gradient purification (2,4). Aliquots of the final preparation were sent to Brussels for the evaluation of insulin synthesis and to perform perfusion experiments, as previously described (5). The other studies were performed in Pisa and Rome, according to previously reported procedures (2,4). The results were compared with those generated with the islets prepared from the pancreas of a 25-year-old woman. Also in this case, the cause of death had been a car accident, and we isolated the islets 2 days after the type 1 diabetic pancreas processing. The methods used were the same and the final purity was  $\sim 90\%$ .

During the isolation process, the islets from the type 1 diabetic patient appeared as discrete round or oval structures that could be identified by dithizone staining. At the end of the isolation and purification procedures, the purity of the islets, as roughly estimated by dithizone staining, was  $\sim 60\%$ .

After 5 days of isolation, the insulin synthetic activity was measured during a 2-h incubation at 10 mmol/l glucose. When expressed as a function of corresponding insulin content, the rate of glucose-induced insulin synthesis in  $\beta$ -cells from the dia-

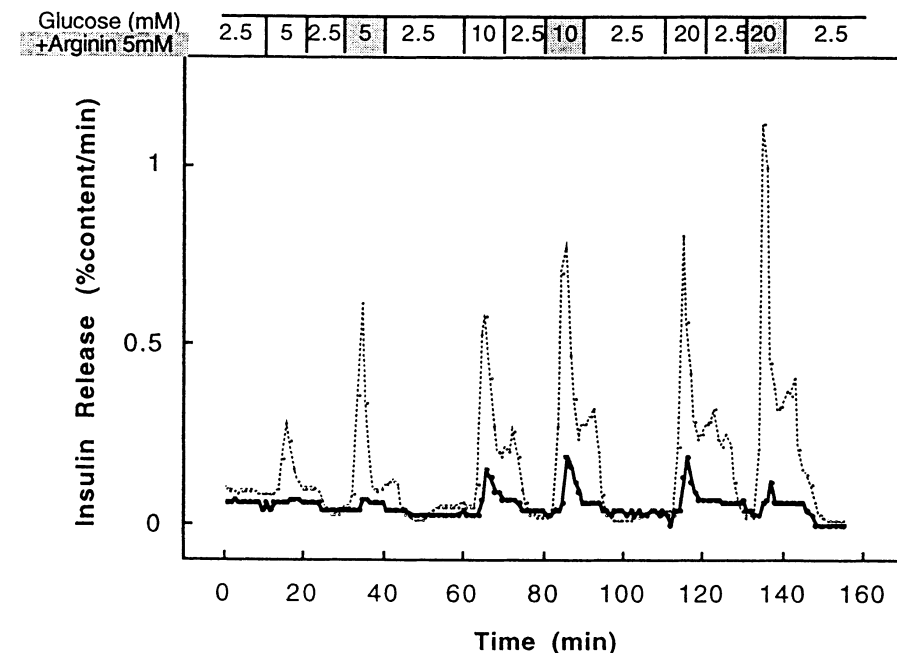

**Figure 1**—Insulin release from human islets isolated from diabetic (—) and control donors (•••). Preparations were perfused with 10-min pulses of varying glucose concentrations with or without 5 mmol/l arginine.

betic pancreas was 76% of the values measured in control cells (4.8 vs. 6.3%).

By the perfusion experiments, the first-phase insulin release was analyzed and the data were expressed as function of insulin content (Fig. 1). The basal insulin discharge from diabetic  $\beta$ -cells was comparable to that from control preparations, whereas their glucose-stimulated activity was markedly reduced. The diabetic islets did not respond to 5 mmol/l glucose, whereas control cells were stimulated 4-fold; their secretory activity increased 2- to 3-fold at 10 and 20 mmol/l glucose, but their maximal activity was still 4-fold lower than that of control values. This reduced glucose responsiveness could not be corrected by the addition of arginine.

The static incubation experiments (mean  $\pm$  SD of 4 to 5 determinations) were performed after 5 and 17 days of isolation, with the islets kept under standardized culture conditions (2,4). Shortly after the isolation, insulin release (expressed as percent of insulin content) in response to 3.3 mmol/l glucose and 3.3 mmol/l glucose + 20 mmol/l arginine was similar in control (respectively  $1.0 \pm 0.2$  and  $1.7 \pm 0.4\%$ ) and type 1 (respectively  $1.2 \pm 0.4$  and  $1.5 \pm 0.3\%$ ) islets, whereas the secretion of the hormone in response to 16.7 mmol/l glucose and 16.7 mmol/l glucose plus 1 mmol/l 3-isobutyl-1-methylxanthine (IBMX) was

lower from type 1 islets (respectively  $1.6 \pm 0.3$  and  $1.9 \pm 0.2\%$ ) than from control cells (respectively  $2.6 \pm 0.6$  and  $3.0 \pm 0.2\%$ ). After 17 days of culture, the difference at high glucose was not observed (high glucose plus IBMX was not tested); insulin secretion, normalized for insulin content, was  $7.8 \pm 1.2\%$  from diabetic islets and  $6.5 \pm 0.5\%$  from control islets.

The release of glucagon (pg/ml, mean  $\pm$  SD of 4 to 5 determinations) from both shortly prepared and cultured type 1 diabetic islets was similar at 3.3 (respectively  $20.6 \pm 1.2$  and  $20.3 \pm 1.1$ ) and 16.7 ( $19.9 \pm 1.6$  and  $20.9 \pm 1.8$ ) mmol/l glucose, whereas the control islets showed a reduction of glucagon release ( $\sim 20\%$ ) in response to high glucose (5-day cultured islets:  $21.8 \pm 1.4$  at 3.3 mmol/l glucose and  $17.6 \pm 1.5$  at 16.7 mmol/l glucose; 17-day cultured islets:  $22.4 \pm 0.9$  at 3.3 mmol/l glucose and  $16.8 \pm 0.2$  at 16.7 mmol/l glucose). The addition of arginine to 3.3 mmol/l glucose caused a similar increase of glucagon release from both diabetic ( $25.2 \pm 4.0$  and  $31.6 \pm 8.7$ , respectively, from 5- and 17-day cultured cells), and control ( $33.1 \pm 6.2$  and  $26 \pm 1.3$ , respectively, from 5- and 17-day cultured cells) islets.

In the present study, the hormonal function of islets prepared from type 1 diabetic patient a few months from the onset of disease is reported for the first

time. In these islets, 8 months after the diagnosis of diabetes, some residual cells capable of insulin synthesis and secretion were still present.

Our results confirm in vivo data showing that the defects of insulin release in this type of diabetes are mainly quantitative and involve a wide range of insulinotropic agents. Interestingly, we found that the characteristics of insulin release of type 1 diabetic islets seemed to improve after a period of culture. This is in agreement with previous data obtained with islets prepared from NOD mice, showing reversal of glucose-induced insulin release suppression after 7 days of culture (6). In that case, removal of intra-islet inflammatory cells was considered as the factor leading to the improved  $\beta$ -cell function. Our results suggest that some of the alterations observed were due, at least in part, to the native type 1 islet environment.

A loss of glucose-modulated glucagon secretion and a maintained sensitivity to arginine have been observed in models of both type 1 and type 2 diabetes (7), suggesting that the defect of glucagon release is mainly due to the diminished insulin levels. In our experiments, glucagon release from the diabetic islets was similar at 3.3 as 16.7 mmol/l glucose and the reduced suppression by high glucose did not change upon culture. On the other hand, in the presence of arginine, a similar increase of glucagon secretion was observed from both diabetic and control islets. Thus, the decreased insulin output from our type 1 diabetes islets was paralleled by minor derangements of glucagon release.

The persistence of some insulin synthetic and secretory function, even a few months after the onset of diabetes, and the improvement of insulin secretion characteristics after removal of the islets from their native environment support the search for strategies aimed to allow the diagnosis and treatment of type 1 diabetes as early as possible in the natural history of the disease.

PIERO MARCHETTI, MD  
FRANCESCO DOTTA, MD  
ZHIDONG LING, PHD  
ROBERTO LUPI, PHD  
SILVIA DEL GUERRA, PHD  
CARMELA SANTANGELO, PHD  
MASSIMO REALACCI, PHD  
LORELLA MARSELLI, MD  
UMBERTO DI MARIO, MD  
RENZO NAVEALESI, MD

From the Department of Endocrinology and Metabolism (P.M., R.L., S.D.G., L.M., R.N.), Metabolic Unit, University of Pisa, Pisa; the Department of Endocrinology (E.D., C.S., M.R., U.D.M.), Second Medical Clinic, "La Sapienza" University, Rome, Italy; and the Beta-Cell Transplant Unit (Z.L.), Vrije Universiteit, Brussels, Belgium.

Address correspondence to Piero Marchetti, MD, Department of Endocrinology and Metabolism, Metabolic Unit, Ospedale Cisanello, Via Paradisa 2, 56100 Pisa, Italy. E-mail: marchant@immr.med.unipi.it.

**Acknowledgments**— This work was supported by grants from the Italian National Research Council, Ministero Università e Ricerca Scientifica e Tecnologica, Regione Toscana, the European Community (BMH1-CT92-0805, BMH4-CT95-1561), the Ministry of Scientific Policy (CE-03-001), the Flemish Community (93/019), Biomed, and the Juvenile Diabetes Foundation International (DIRP 995004).

The authors thank Renè De Proft, Lutgart Heylen, Gabriel Schoonjans, and Luc Bouwens for technical assistance.

.....

#### References

- Conget I, Fernandez-Alvarez J, Ferrer J, Sarri Y, Novials A, Somoza N, Pujol-Borrel R, Casamitjana R, Gomis R: Human pancreatic islet function at the onset of type 1 (insulin-dependent) diabetes mellitus. *Diabetologia* 36:358–360, 1993
- Marchetti P, Giannarelli R, Cosimi S, Masiello P, Coppelli A, Viacava P, Navalesi R: Massive isolation, morphological and functional characterization, and xenotransplantation of bovine pancreatic islets. *Diabetes* 44:375–381, 1995
- Keymeulen B, Ling Z, Gorus FK, Delvaux G, Bouwens L, Gruppig A, Hendrickx C, Pipeleers-Marichal M, Van Schravendijk C, Salmela K, Pipeleers DG: Implantation of standardized beta-cell graft in a liver segment of IDDM patients: graft and recipient characteristics in two cases of insulin-independence under maintenance immunosuppression for prior kidney graft. *Diabetologia* 41:452–459, 1998
- Pupilli C, Giannini S, Marchetti P, Lupi R, Antonelli A, Malavasi F, Takasawa S, Okamoto H, Ferrannini E: Autoantibodies to CD38 (ADP-ribosyl cyclase/cyclic ADP-ribose hydrolase) in Caucasian patients with diabetes: effects on insulin release from human islet cells. *Diabetes* 48:2309–2315, 1999
- Ling Z, Pipeleers D: Prolonged exposure of human beta-cells to elevated glucose levels results in sustained cellular activation with a loss of glucose regulation. *J Clin Invest* 98:2805–2812, 1996
- Strandell E, Eizirik DL, Sandler S: Reversal of beta-cell suppression in vitro in pancreatic islets isolated from NOD mice during the phase preceding insulin-dependent diabetes mellitus. *J Clin Invest* 85:1944–1950, 1990
- Ishida K, Mizuno A, Sano T, Shi K, Shima K: Plasma glucagon responses to insulin-induced hypoglycemia and arginine in spontaneous non-insulin-dependent diabetes mellitus rats, Otsuka Long Evans Tokushima Fatty (OLETF) strain. *Acta Endocrinol (Copenh)* 129:585–593, 1993

## Circulating Levels of Coagulation Factor XIII in Subjects With Type 2 Diabetes and in Their First-Degree Relatives

Coagulation factor XIII (FXIII) circulates in plasma as an inactive tetramer of 2 A- (catalytic) and 2 B- (carrier) subunits. When activated by thrombin, it catalyzes the cross-linking of fibrin chains and  $\alpha_2$ -antiplasmin to fibrin (1), thereby increasing the mechanical strength and fibrinolytic resistance of fibrin clot. A functional role for FXIII in thrombotic disease is suggested by the finding that the *Leu* allele at the common Val34Leu polymorphism in the FXIII A-subunit gene appears to protect against both myocardial infarction and venous thromboembolism (2,3).

We compared 173 subjects with type 2 diabetes (48 treated with diet alone, 6 treated with insulin, 21 treated with metformin, 73 treated with sulfonylurea, and 25 treated with combined sulfonylurea and metformin therapy) with a group of 110 nondiabetic healthy control subjects of similar age (mean age 63 years). Additionally, 132 first-degree relatives (44 siblings, 77 children, and 4 parents) of subjects with type 2 diabetes were compared with a second control group of 151 healthy subjects of similar age (mean ages 45 and 47 years, respectively). All of the subjects had been recruited for earlier hemostasis studies (4,5).

Circulating levels of FXIII were measured in citrated plasma samples. FXIII A- and B-subunit antigen levels were measured by use of a sandwich enzyme-linked immunosorbent assay method (6), and FXIII activity was measured by a sensitive microtiter assay using fibrinogen and 5-(biotinamido)pentylamine (6). Geno-

type at the FXIII codon34 (Val34Leu) polymorphism was determined by use of a previously described method (3).

Mean ( $\pm$  SD) circulating levels of FXIII A-subunit antigen and B-subunit antigen were higher in diabetic subjects than in control subjects ( $117 \pm 29$  vs.  $98 \pm 27\%$  and  $125 \pm 26$  vs.  $109 \pm 26\%$ , respectively), and these differences remained after adjustments for age, sex, BMI, smoking habit, and fibrinogen levels; the adjusted mean values were 120 vs. 96% for the A-subunit and 126 vs. 109% for the B-subunit ( $P < 0.0005$  for each comparison). In contrast, the levels of FXIII cross-linking activity were not different between the type 2 diabetic subjects and the control subjects ( $104 \pm 33$  vs.  $101 \pm 37\%$ ). Levels of FXIII in diabetic subjects were not altered by exclusion of those subjects with a clinical history of coronary artery disease, cerebrovascular disease, peripheral vascular disease, or diabetic retinopathy, and levels of FXIII showed no heterogeneity across antidiabetic treatment groups.

In relatives of subjects with type 2 diabetes, mean levels of FXIII A-subunit were higher than those in control subjects ( $116 \pm 38$  vs.  $103 \pm 29\%$ , respectively,  $P < 0.001$ ), and this difference remained after adjustment for age, sex, BMI, smoking habit, and fibrinogen level ( $117$  vs.  $106\%$ , respectively,  $P = 0.012$ ). However, levels of FXIII B-subunit ( $110 \pm 29$  vs.  $108 \pm 36\%$ ) and FXIII cross-linking activity ( $93 \pm 37$  vs.  $103 \pm 41\%$ ) were not significantly different between relatives and control subjects.

Levels of FXIII B-subunit antigen showed a consistent pattern of correlation with other recognized cardiovascular risk factors (i.e., fibrinogen, factor VII coagulant activity, cholesterol levels, triglyceride levels, and HbA<sub>1c</sub> levels [ $r \geq 0.16$  and  $P \leq 0.05$  for each factor]). In the diabetic patients and relative groups, there was also a significant correlation of levels of FXIII B-subunit with insulin, homeostasis model assessment insulin resistance (7), and PAI-1 levels ( $r = 0.16$ ,  $P \leq 0.05$ ). FXIII A-subunit antigen levels were correlated with levels of fibrinogen only ( $r = 0.25$ ,  $P = 0.001$ ) in the diabetic patients and in the younger control group ( $r = 0.23$ ,  $P = 0.008$ ).

Factor XIII activity levels rose as the number of Leu alleles increased at the FXIII codon34 (Val34Leu) polymorphism in each group. There was no consistent pattern of association of the Val34Leu genotype with levels of FXIII A- or B-subunit antigen across the groups.

These findings suggest that elevated levels of FXIII A-subunit may precede the development of diabetes and arise through some mechanism(s) shared with those that contribute to the familial predisposition to type 2 diabetes. It is not clear what that mechanism may be. There was no association between the A-subunit level and the fasting glucose level, the HbA<sub>1c</sub> level, or any measured metabolic feature of diabetes, its vascular complications, or its treatment. However, it is possible that raised FXIII A-subunit levels may be an early marker of subclinical vascular damage.

FXIII A-subunits circulate only in FXIII tetramer, whereas B-subunits circulate in both tetrameric and free dimeric forms. This distinction and the differing sites of synthesis of the 2 subunits (8) may account for the difference in findings for levels of A- and B-subunits across the groups studied. Furthermore, the consistency of the correlation between circulating levels of FXIII B-subunit antigen and other cardiovascular risk markers raises the possibility of an underlying association with insulin resistance. However, if there is a functional significance of increased FXIII B-subunit levels, it has yet to be elucidated.

Despite the clear differences in levels of FXIII subunit antigens, there was no difference in the levels of FXIII activity between diabetic subjects or first-degree relatives and age-matched control subjects. It is possible that the influence of genotype at the Val34Leu polymorphism on FXIII activity levels (9,10) may have overriding importance, because, even after adjustment for its influence, no difference was found between the subject groups. Furthermore, the extent to which in vitro measurements of FXIII activity reflect in vivo physiological FXIII function is unclear.

In conclusion, levels of FXIII A- and B-subunit antigen are elevated in subjects with type 2 diabetes, and levels of FXIII A-subunit antigen are elevated in relatives of subjects with type 2 diabetes. Levels of FXIII B-subunit antigen show a consistent pattern of correlation with other vascular risk markers, which supports the possibility of an underlying association with insulin resistance.

MICHAEL W. MANSFIELD, DM, MRCP  
HANS P. KOHLER, MD  
ROBERT A. S. ARIËNS, PHD  
LYNN J. MCCORMACK, PHD  
PETER J. GRANT, MD, FRCP

From the Academic Unit of Molecular Vascular Medicine, University of Leeds, Leeds, U.K.

Address correspondence to Michael W. Mansfield, DM, MRCP, Academic Unit of Molecular Vascular Medicine, G-Floor, Martin Wing, General Infirmary at Leeds, Leeds LS1 3EX, U.K. E-mail: m.w.mansfield@leeds.ac.uk.

**Acknowledgments**— This study was supported by the British Heart Foundation. H.P.K. has received funds from the Swiss Foundation for medical-biological grants.

## References

- Greenberg CS, Birckbichler PJ, Rice RH: Transglutaminases: multifunctional cross-linking enzymes that stabilize tissues. *FASEB J* 5:3071–3077, 1991
- Catto AJ, Kohler HP, Coore J, Mansfield MW, Stickland MH, Grant PJ: Association of a common polymorphism in the factor XIII gene with venous thrombosis. *Blood* 93:906–908, 1999
- Kohler HP, Stickland MH, Ossei-Gerning N, Carter A, Grant PJ: Association of a common polymorphism in the factor XIII gene with myocardial infarction. *Thromb Haemost* 79:8–13, 1998
- Mansfield MW, Heywood DM, Grant PJ: Sex differences in coagulation and fibrinolysis in white subjects with non-insulin-dependent diabetes mellitus. *Arterioscler Thromb Vasc Biol* 16:160–164, 1996
- Mansfield MW, Heywood D, Grant PJ: Circulating levels of factor VII, fibrinogen, and von Willebrand factor and features of insulin resistance in first-degree relatives of patients with NIDDM. *Circulation* 94:2171–2176, 1996
- Ariëns RAS, Kohler HP, Mansfield MW, Grant PJ: Subunit antigen and activity levels of coagulation factor XIII in healthy individuals: relationship to gender, age, smoking and hypertension. *Arterioscler Thromb Vasc Biol* 19:2012–2016, 1999
- Matthews DR, Hosker JP, Rudenski AS, Naylor BA, Treacher DF, Turner RC: Homeostasis model assessment: insulin resistance and  $\beta$ -cell function from fasting plasma glucose and insulin concentrations in man. *Diabetologia* 28:412–419, 1985
- Schmeling A, Bockholdt B, Schroder H, Geserick G: Phenotype change in polymorphic plasma proteins following liver transplantation. *Exp Clin Immunogenet* 13:78–83, 1996
- Kangadalam S, Board PG: The Val34Leu polymorphism in the A subunit of coagulation factor XIII contributes to the large normal range in activity and demonstrates that the activation peptide plays a role in catalytic activity. *Blood* 92:2766–2770, 1998
- Kohler HP, Ariëns RAS, Whitaker P, Grant

PJ: A common coding polymorphism in the FXIII A-subunit gene (FXIIIVal34Leu) affects cross-linking activity (Letter). *Thromb Haemost* 80:704, 1998

## Effect of Aldose Reductase Inhibitor on Cutaneous Nerve Fiber Length in Diabetic Patients

For the treatment of diabetic neuropathy, how to evaluate the efficacy of given compounds is important. Although the most reliable method may be a morphological examination, performing a nerve biopsy is not usually recommended for diagnosing diabetic neuropathy because it may be harmful. In this context, skin biopsy is safe and reproducible. In addition, since the cutaneous nerve is a terminal part of the sensory nerve where nerve fibers start to degenerate and readily regenerate in sensory neuropathies, examining cutaneous nerves may well be rationalized to evaluate the therapeutic effects of the drugs. Immunohistochemical analysis of dermal nerves using antibodies against protein gene product (PGP) 9.5, neuron specific panaxonal marker, may be useful to evaluate sensory neuropathies (1). We reported that dermal nerve fiber length (NFL), which was obtained by measuring nerve fiber PGP 9.5, immunostained, and labeled with streptavidin fluorescein isothiocyanate under confocal laser scanning microscopy, was significantly shorter in diabetic patients than in control subjects (2).

Using this technique, we evaluated the therapeutic effect of aldose reductase inhibitor (ARI) epalrestat in 32 type 2 diabetic patients with neuropathy. Nineteen patients were treated with epalrestat (50 mg) 3 times per day for ~13 months (ARI group) and 12 patients served as control subjects (control group). At the start of the trial, there were no significant differences between the clinical backgrounds of the 2 groups. No significant change in HbA<sub>1c</sub> was found in either group during the trial. Since NFL was highly variable but reproducible for individual patients, the effect of epalrestat on NFL was evaluated by its percent change during the trial. The percent change of

epidermal NFL was not different between the 2 groups, whereas the percent change of dermal NFL was significantly greater in the ARI group ( $249 \pm 478\%$ ) than in the control group ( $29 \pm 40\%$ ). The number of patients whose percent change of dermal NFL exceeded its mean  $\pm 2$  SD (109%) in control group was significantly higher in the ARI group than in the control group ( $P < 0.05$ , 8/19 vs. 1/12). Ultrastructurally, the fine fibers proliferating in the upper dermis of the patients with increased NFL proved to be composed of an increased number of axons with incomplete Schwann cell coverage, a finding compatible with regenerating nerve fibers.

The effect of ARI on the regenerative capacity of myelinated nerve fibers has already been reported in clinical (3) and experimental studies (4). The present study shows that small nerve fibers, mainly composed of unmyelinated nerve fibers of the sensory nerve terminal, could also regenerate or sprout with ARI. The possible mechanisms by which aldose reductase plays a role in the pathogenesis of diabetic neuropathy may also be relevant to the mechanisms by which ARI improves dermal nerve regeneration. In addition, ARI improves decreased content of nerve growth factor (NGF) in the sciatic nerves of diabetic rats (5). NGF which is essential for the development of collateral reinnervation from cutaneous C-fibers (6), depletes keratinocytes in the skin of diabetic patients (7) and may be reversed by ARI. Unlike dermal innervation, epidermal innervation was not improved with ARI. This finding may suggest that regenerating or sprouting nerves of the dermis cannot easily enter the epidermis in a diabetic state, rather than that epidermal nerves cannot regenerate or sprout, since epidermal innervation was very poor in most patients. Glycated basement membrane of the epidermis may prevent reinnervation of dermal nerve fibers into the epidermis.

HITOSHI YASUDA, MD, PHD  
AKINORI HIRAI, MD, PHD  
MARI JOKO, MD, PHD  
MASAHICO TERADA, MD, PHD  
TORU KAWABATA, MD, PHD  
KENGO MAEDA, MD, PHD  
MASAKAZU HANEDA, MD, PHD  
ATSUNORI KASHIWAGI, MD, PHD  
TOSHIHIRO MAEDA, MD, PHD  
RYUICHI KIKKAWA, MD, PHD

From the Third Department of Medicine (H.Y., A.H., J.M., M.T., T.K., K.M., M.H., A.K., R.K.) and the Department of Anatomy (T.M.), Shiga University of Medical Science, Otsu, Shiga, Japan.

Address correspondence to Hitoshi Yasuda, MD, PhD, Third Department of Medicine, Shiga University of Medical Science, Otsu, Shiga 520-2192, Japan. E-mail: hyasuda@belle.shiga-med.ac.jp.

## References

- McCarthy BG, Hsieth ST, Stocks A, Hauer P, Macko C, Cornblath DR, Griffin JW, McArthur: Cutaneous innervation in sensory neuropathies: evaluation by skin biopsy. *Neurology* 45:1848-1855, 1995
- Hirai A, Yasuda H, Joko M, Maeda T, Kikkawa R: Evaluation of diabetic neuropathy through the quantitation of cutaneous nerves. *J Neurol Sci* 172:55-62, 2000
- Sima AA, Bril V, Nathaniel V, McEwen TA, Brown MB, Lattimer SA, Greene DA: Regeneration and repair of myelinated fibers in sural nerve biopsy specimens from patients with diabetic neuropathy treated with sorbinil. *N Engl J Med* 319:548-555, 1988
- Terada M, Yasuda H, Kikkawa R, Shigeta Y: Tolrestat improves nerve regeneration after crush injury in streptozocin-induced diabetic rats. *Metabolism* 45:1189-1195, 1996
- Ohi T, Saita K, Furukawa S, Ohta M, Hayashi K, Matsukura S: Therapeutic effects of aldose reductase inhibitor on experimental diabetic neuropathy through synthesis/secretion of nerve growth factor. *Exp Neurol* 151:215-220, 1998
- Doubleday B, Robinson PP: The role of nerve growth factor in collateral reinnervation by cutaneous C-fibers in the rat. *Brain Res* 593:179-184, 1992
- Anand P, Terenghi G, Warner G, Kopelman P, Williams-Chestnut RE, Sinicropi DV: The role of endogenous nerve growth factor in human diabetic neuropathy. *Nat Med* 2:703-707, 1996

## Prevalence of Diabetes in Adult Patients With Down's Syndrome Living in a Residential Home

Previous studies reported an increased prevalence of diabetes in patients with Down's syndrome (1-3). These studies, however, were limited to young people with Down's syndrome. Recently, mortality from Down's syndrome has declined, and life expectancy in Down's syndrome patients has improved (4,5). It is



important to examine the prevalence of diabetes in adult patients with Down's syndrome to prevent diabetic complications and cardiovascular disease.

In this study, we examined the prevalence of diabetes in adult patients with Down's syndrome living in a residential home for adults with mental and physical handicaps. Data were collected for 40 adult patients identified as having Down's syndrome by chromosome analysis (26 patients with regular trisomy 21, 13 patients with mosaic trisomy 21, and 1 patient with trisomy 21 by translocation). Of the 40 subjects, 27 were men and 13 were women. The mean ages of the men and women were  $47.7 \pm 5.8$  years (range 37–62) and  $48.8 \pm 6.6$  years (38–62), respectively. The BMIs of the men and women were  $22.0 \pm 2.7$  and  $21.8 \pm 2.1$  kg/m<sup>2</sup>, respectively. The mean fasting plasma glucose (FPG) levels for the men and women were  $5.1 \pm 0.4$  mmol/l ( $92.1 \pm 7.6$  mg/dl) and  $5.1 \pm 0.5$  mmol/l ( $92.3 \pm 8.3$  mg/dl), respectively. The FPG for the patients was no more than 6.0 mmol/l (108 mg/dl). According to the new American Diabetes Association criteria for diabetes using FPG (6), none of the patients were classified as having diabetes or impaired fasting glucose (IFG). The DECODE Study Group showed that 3,119 subjects (10.7%) had IFG and 1,143 subjects (3.9%) had diabetic FPG among the 29,108 people (mean age 53.3 years, mean BMI 26.1 kg/m<sup>2</sup>) without previously diagnosed diabetes, according to the new fasting category (7). Another study reported that 70.6% of men and 95.8% of women with Down's syndrome living in the community were categorized as overweight (BMI  $\geq 25.1$  kg/m<sup>2</sup>) (8). In our study, 3 of the men (11.1%) and none of the women were categorized as overweight. It seems that the very low prevalence of diabetes in our study results from the good control of body weight, which may be related to a stable lifestyle. This includes a proper diet (2,000 kcal/day) and appropriate exercise (an hour of walking each day) for the patients living in their residential home. Greater emphasis should be given to the prevention of excessive weight gain through proper diet and appropriate exercise to reduce the prevalence of diabetes in the general population as well as in patients with Down's syndrome.

YOSHIO OHYAMA, MD  
TOSHIHIRO UTSUGI, MD

TSUYOSHI UCHIYAMA, MD  
TAKUJI HANAOKA, MD  
SHOICHI TOMONO, MD  
MASAHICO KURABAYASHI, MD

From the Second Department of Internal Medicine (Y.O., T.U., T.U., M.K.), the Health Science Gunma University School of Medicine (S.T.), Gunma; and the Association for the Welfare of the Mentally and Physically Handicapped (T.H.), Gunma, Japan.

Address correspondence to Yoshio Ohyama, MD, the Second Department of Internal Medicine, Gunma University School of Medicine, 3-39-22, Showa, Maebashi, Gunma, 371-8511, Japan. E-mail: ohyamay@news.sb.gunma-u.ac.jp.

.....

## References

1. Farquhar JW: Diabetic children in Scotland and the need for care. *Scot Med J* 7: 119–123, 1962
2. Milunsky A, Neurath PW: Diabetes mellitus in Down's syndrome. *Arch Environ Health* 17:372–376, 1968
3. Jeremiah DE, Leyshon GE, Rose T, Francis HWS, Elliott RW: Down's syndrome and diabetes. *Psychol Med* 3:455–457, 1973
4. Declining mortality from Down syndrome: no cause for complacency (Editorial). *Lancet* 335:888–889, 1990
5. Baird PA, Sadovnick AD: Life expectancy in Down syndrome. *J Pediatr* 110:849–854, 1987
6. Expert Committee on the Diagnosis and Classification of Diabetes Mellitus: Report of the Expert Committee on the Diagnosis and Classification of Diabetes Mellitus. *Diabetes Care* 20:1183–1197, 1997
7. The DECODE Study Group on behalf of the European Diabetes Epidemiology Group: Is fasting glucose sufficient to define diabetes? Epidemiological data from 20 European studies. *Diabetologia* 42: 647–654, 1999
8. Bell AJ, Bhate MS: Prevalence of overweight and obesity in Down's syndrome and other mentally handicapped adults living in the community. *J Intellect Disabil Res* 36:359–364, 1992

## Effect of Data Management on a Central Server on HbA<sub>1c</sub> Levels in Insulin-Requiring Patients

**S**elf-monitoring of blood glucose (SMBG) is critically important to adjust insulin doses appropriately. Given the general level of poor control of

HbA<sub>1c</sub> concentrations in insulin-requiring patients (1,2), it is obvious that SMBG is not being used effectively. Barriers to its effective use rest with both patients (inconvenience, pain, and cost) and physicians (lack of time for analysis and communication with the patients and, in some cases, lack of expertise for analysis). A major problem for some patients is also a lack of time for appropriate communication with the physician or the health care provider responsible for insulin dose adjustments. We studied the effect of removing the impediments of lack of time and expertise in analysis of HbA<sub>1c</sub> concentrations in insulin-requiring patients.

We recruited 29 patients taking insulin for the study (12 men, 17 women; 10 with type 1 diabetes, 19 with type 2 diabetes). Of the 29 patients, 15 were on a mixed/split regimen, 4 on a preprandial regular or lispro plus bedtime NPH regimen, and 10 on a bedtime NPH, daytime sulfonylurea agent regimen. Although 23 of them were performing SMBG at the beginning of the study, most could communicate only sporadically with the educator (who adjusted insulin doses in my practice) because of conflicts in both of their busy schedules.

All of the patients were given a One-Touch Profile meter (LifeScan, Milpitas, CA) at the onset of the study (pretest), and communication with the educator for the following 4 weeks was stressed. At that point (baseline), patients were instructed in the use of a reporter (a device that connected the meter to their phone), which transferred the data via a modem to a central server. The data were analyzed by an algorithm developed by one of the authors (M.B.D.). The results were faxed to the educator and mailed to the patient.

HbA<sub>1c</sub> concentrations were measured at pretest (in most patients), baseline, and 10 and 20 weeks later. The mean value for the pretest and baseline measurements was 8.4%, falling to 7.9% at 10 weeks and 7.7% at 20 weeks. Sixteen of the patients had mean initial values  $>8.0\%$  and were analyzed separately, because the American Diabetes Association's guidelines require action at this point. In these patients at high risk for the microvascular complications of diabetes, the mean value for the pretest and baseline measurements was 9.1%, falling to 8.5% at 10 weeks and



8.3% at 20 weeks. Data management by the central server significantly lowered the 10- and 20-week HbA<sub>1c</sub> concentrations in both groups ( $P < 0.001$  by analysis of variance).

The (nonsignificant) difference between the baseline and pretest HbA<sub>1c</sub> concentrations in the whole cohort was 0.4%, and in the high-risk patients, 0.3%. Since 50% of the changes in HbA<sub>1c</sub> concentrations occur in the first month (3,4), the similarity of the pretest and baseline values shows the absence of the Hawthorne effect.

Convenience and efficient use of time for both the patient and educator (it took <1 min for the educator to decide on insulin dose adjustments after reviewing the information provided by the central server) were important factors in the success of central data management of SMBG values in this small study. Wider application of this technology should improve diabetes control in populations of insulin-requiring patients.

MAYER B. DAVIDSON, MD  
GWYNETH LEWIS, MAOM

From the Clinical Trials Unit (M.B.D.), Charles R. Drew University, Los Angeles; and City of Hope National Medical Center (G.L.), Duarte, California.

Address correspondence to Mayer B. Davidson, MD, Clinical Trials Unit (MP 30), Charles R. Drew University, 1731 E. 120th St., Los Angeles, CA. E-mail: madavids@cdrewu.edu.

**Acknowledgments**—Dr. Davidson is supported by National Institutes of Health Grant #5U01-DKS54047.

We thank Mary Pearce and Barbara Wisehart, who also helped manage some of these patients.

## References

- Davidson MB: Diabetes care in health maintenance organisation and fee-for-service settings. *Dis Manage Health Outcomes* 2:189–197, 1997
- Hayward RA, Manning WG, Kaplan SH, Wagner EH, Greenfield S: Starting insulin therapy in patients with type 2 diabetes: effectiveness, complications, and resource utilization. *JAMA* 278:1663–1669, 1997
- Tahara Y, Shima K: The response of GHb to stepwise plasma glucose change over time in diabetic patients. *Diabetes Care* 16: 1313–1314, 1993
- Tahara Y, Shima K: Kinetics of HbA<sub>1c</sub>, glycated albumin, and fructosamine and analysis of their weight functions against preceding plasma glucose level. *Diabetes Care* 18:440–447, 1995

## Prevalence of Diabetes, Impaired Glucose Tolerance, and Impaired Fasting Glucose in a Rural Population of Korea, According to 1997 American Diabetes Association and 1985 World Health Organization Criteria

In 1997, the American Diabetes Association (ADA) proposed new criteria for defining diabetes based on fasting plasma glucose (FPG) (1). A new diagnostic entity, impaired fasting glucose (IFG), was also introduced. However, consequent studies have pointed out several limitations of the new ADA criteria, such as a significant difference in the prevalence of diabetes according to the World Health Organization (WHO) criteria and ADA criteria (2). There is also considerable discordance between IFG and impaired glucose tolerance (IGT) and a lower sensitivity of IFG for predicting the progression to diabetes (3) or development of cardiovascular disease (4).

To examine the prevalence of different categories of glucose tolerance in a rural population of Korea using the 1997 ADA and the 1985 WHO criteria, 1,108 subjects (aged 40–99 years) living in the

Chongup area of Korea were subjected to a 2-h oral glucose tolerance test. The prevalence of glucose tolerance categories was obtained using the WHO criteria and the ADA fasting plasma glucose criteria. Anthropometric and metabolic characteristics of the subjects with different categories were compared.

The prevalence of known diabetes in this population was 3.4%. The prevalence of unknown diabetes by WHO criteria and ADA criteria was 4.7% (95% CI 3.5–5.9%) and 4.5% (3.3–5.7%), respectively. When the data were adjusted to the standard world population of Segi (5), the prevalence of diabetes was 7.1% by WHO criteria and 7.7% by ADA criteria. Among elderly subjects aged >65, the prevalence of unknown diabetes by ADA criteria was slightly, but not significantly, less (3.3%; 95% CI 1.5–5.1%) than the prevalence by WHO criteria (4.5%; 2.5–6.5%).

On the other hand, the prevalence of IGT by WHO criteria (12.4%; 95% CI 10.5–14.3%) was significantly higher than that of IFG by ADA criteria (6.3%; 4.9–7.7,  $P < 0.01$ ). Of the 137 subjects with IGT by WHO criteria, 104 (75.9%) were classified as normoglycemic by ADA criteria. The level of agreement between the 2 criteria was low ( $\kappa = 0.42$ ,  $P < 0.001$ ).

To compare clinical characteristics of the subjects with IGT and IFG according to WHO and ADA diagnostic criteria, we classified nondiabetic subjects by both criteria into 4 categories (Table 1). The concordant IGT/IFG group showed higher BMI and waist-to-hip ratio, systolic

**Table 1—Comparison of clinical and metabolic characteristics of patients in the various categories of glucose tolerance by 1997 ADA and 1985 WHO classifications**

|                                 | NGT/NFG      | IGT/NFG      | NGT/IFG      | IGT/IFG       |
|---------------------------------|--------------|--------------|--------------|---------------|
| <i>n</i>                        | 841          | 104          | 34           | 29            |
| Age (years)                     | 60.3 ± 9.4   | 65.4 ± 10.4* | 61.5 ± 10.8  | 64.2 ± 9.4*   |
| BMI (kg/m <sup>2</sup> )        | 23.6 ± 2.9   | 23.7 ± 3.5   | 24.1 ± 3.7   | 25.5 ± 2.8*   |
| Waist-to-hip ratio              | 0.88 ± 0.06  | 0.88 ± 0.06  | 0.90 ± 0.06  | 0.91 ± 0.06*  |
| FPG (mmol/l)                    | 4.8 ± 0.6    | 5.2 ± 0.5*   | 6.4 ± 0.3*†  | 6.5 ± 0.3*†   |
| 2-h Plasma glucose (mmol/l)     | 6.0 ± 0.8    | 8.8 ± 0.8*‡  | 6.7 ± 0.8*   | 9.0 ± 0.9*‡   |
| Systolic blood pressure (mmHg)  | 131.5 ± 22.6 | 134.8 ± 23.2 | 136.2 ± 23.6 | 151.1 ± 25.6* |
| Diastolic blood pressure (mmHg) | 85.2 ± 11.8  | 85.4 ± 12.4  | 86.5 ± 14.4  | 90.6 ± 12.1   |
| Total cholesterol (mmol/l)      | 5.2 ± 0.9    | 5.4 ± 0.9    | 5.5 ± 0.9    | 5.2 ± 0.9     |
| Triglyceride (mmol/l)           | 1.8 ± 1.1    | 2.3 ± 1.5*   | 1.9 ± 0.7    | 2.6 ± 1.7*    |
| HDL cholesterol (mmol/l)        | 1.2 ± 0.3    | 1.2 ± 0.3    | 1.2 ± 0.3    | 1.1 ± 0.3     |

Data are *n* or means ± SD. \* $P < 0.05$  vs. NGT/NFG; † $P < 0.05$  vs. IGT/NFG; ‡ $P < 0.05$  vs. NGT/IFG.

blood pressure, FPG and 2-h plasma glucose (PP2), and plasma triglyceride levels than concordant normal subjects. Both normal glucose tolerance (NGT)/IFG and IGT/NFG groups had higher FPG and PP2 than concordant normal subjects. The IGT/NFG group also showed higher ages and plasma triglyceride levels than the concordant normal group. As expected, the NGT/IFG group exhibited significantly higher FPG and lower PP2 values than the IGT/NFG group. However, there was no significant difference in all other variables between the 2 groups.

The present study found that the prevalence of diabetes among Koreans in the rural area by ADA and WHO criteria was similar: 8.1% by WHO criteria and 7.9% by ADA criteria. However, the prevalence of diabetes by ADA criteria was, although statistically not significant, 1.2% lower than that by WHO criteria in the elderly subjects age >65. In addition, although FPG was not related to age, 2-h glucose levels were significantly correlated with age ( $r = 0.27$ ,  $P < 0.05$ ). These observations suggest that ADA criteria may underestimate the prevalence of diabetes, especially in the elderly subjects, because of the increased sensitivity of the 2-h glucose values to aging.

In agreement with most previous studies (2,6), the prevalence of IGT by WHO criteria was almost 2-fold higher than that of IFG by ADA criteria. In addition, the concordance between subjects with IFG and IGT was not high. Thus, the 2 tests appear to diagnose 2 different populations of subjects with disturbed glucose metabolism. Accordingly, Gimeno et al. (6) reported that the subjects with IGT had higher blood pressure and triglyceride levels and lower HDL cholesterol levels than the subjects with IFG. On the other hand, the present study and the study by Larsson et al. (7) showed that the subjects with IGT and the subjects with IFG are comparable in terms of BMI, blood pressure, and plasma lipids. However, considering higher cardiovascular events in the subjects with IGT (4), it is quite possible that factors other than ordinary coronary risk factors (8) may be different in the 2 diagnostic groups.

JOONG-YEOL PARK, MD  
YOUNG I. KIM, MD  
CHEOL S. CHOI, MD  
YUN E. CHUNG, MD  
SANG-WOOK KIM, MD

MOO-SONG LEE, MD  
SANG I. LEE, MD  
SUNG K. HONG, MD  
KI-UP LEE, MD

From the Departments of Internal Medicine (J.-Y.P., Y.I.K., C.S.C., Y.E.C., S.-W.K., S.K.H., K.-U.L.) and Preventive Medicine (M.-S.L., S.I.L.), University of Ulsan College of Medicine, Seoul, Korea.

Address correspondence to Ki-Up Lee, MD, the Department of Internal Medicine, University of Ulsan College of Medicine, 388-1 Poong-Nap Dong, Song-Pa Ku, Seoul 138-736, Korea. E-mail: kulee@www.amc.seoul.kr.

## References

1. The Expert Committee on the Diagnosis and Classification of Diabetes Mellitus: Report of the Expert Committee on the Diagnosis and Classification of Diabetes Mellitus. *Diabetes Care* 20:1183-1197, 1997
2. Wahl PW, Savage PJ, Psaty BM, Orchard TJ, Robbins JA, Tracy RP: Diabetes in older adults: comparison of 1997 American Diabetes Association classification of diabetes mellitus with 1985 WHO classification. *Lancet* 352:1012-1015, 1998
3. Shaw JE, Zimmet PZ, de Courten M, Dowse GK, Chitson P, Gareeboo H, Hemraj F, Fareed D, Tuomilehto J, Alberti KG: Impaired fasting glucose or impaired glucose tolerance: what best predicts future diabetes in Mauritius? *Diabetes Care* 22: 399-402, 1999
4. Tominaga M, Eguchi H, Manaka H, Igarashi K, Kato T, Sekikawa A: Impaired glucose tolerance is a risk factor for cardiovascular disease, but not impaired fasting glucose: the Funagata Diabetes Study. *Diabetes Care* 22:920-924, 1999
5. King H, Rewers M: Global estimates for prevalence of diabetes mellitus and impaired glucose tolerance in adults. WHO Ad Hoc Diabetes Reporting Group. *Diabetes Care* 16:157-177, 1993
6. Gimeno SGA, Ferreira SRG, Franco LJ, Iunes M, the Japanese-Brazilian Diabetes Study Group: Comparison of glucose tolerance categories according to World Health Organization and American Diabetes Association diagnostic criteria in a population-based study in Brazil. *Diabetes Care* 21:1889-1892, 1998
7. Larsson H, Berglund G, Lindgarde F, Ahren B: Comparison of ADA and WHO criteria for diagnosis of diabetes and glucose intolerance. *Diabetologia* 41:1124-1125, 1998
8. Harjai KJ: Potential new cardiovascular risk factors: left ventricular hypertrophy, homocysteine, lipoprotein(a), triglycerides, oxidative stress, and fibrinogen. *Ann Intern Med* 131:376-386, 1999

## Rapid Remission of Nephrotic-Range Proteinuria in a Case of Histologically Proven Diabetic Nephropathy Treated With an ACE Inhibitor

In the past, a relentless decline in renal function was considered inevitable in diabetic nephropathy with nephrotic-range proteinuria (1). Some recent studies, however, have demonstrated that the use of ACE inhibitors can maintain stable renal function and reduce proteinuria in relatively young type 1 diabetic patients with nephrotic-range proteinuria (2-4). In these studies, nephrotic-range proteinuria remitted within a few years after commencing treatment with an ACE inhibitor. We discuss here an elderly type 2 diabetic woman who presented with nephrotic syndrome due to biopsy-proven diabetic nephropathy. Treatment with an ACE inhibitor, temocapril, resulted in an extremely rapid decrease of proteinuria on 2 separate occasions.

A 69-year-old Japanese woman was admitted to our hospital in March 1998 with abdominal pain and constipation. Her medical and family histories were unremarkable and the patient had not undergone a health check-up in the past. She was 150 cm tall and weighed 46 kg. Her blood pressure was 153/80 mmHg and no pretibial edema was present. Laboratory studies revealed a fasting plasma glucose (FPG) level of 14.2  $\mu\text{mol/l}$ , an HbA<sub>1c</sub> concentration of 8.8% (normal range 4.2-5.5%), a serum creatinine level of 44.2  $\mu\text{mol/l}$ , a serum albumin level of 26 g/l, and a serum cholesterol level of 5.35  $\mu\text{mol/l}$ . Urinalysis showed 3+ proteinuria with normal sediment. The 24-h urinary protein excretion was 7.2 g and creatinine clearance was 1.59 ml/s. She was treated conservatively, under the diagnosis of intestinal pseudo-obstruction, and her abdominal symptoms improved rapidly. In addition to protein and salt restriction (30 g/day and 3 g/day, respectively), temocapril (Acecol) (2 mg/day) together with glimepiride (20 mg/day) and voglibose (0.6 mg/day) were started in the hospital. The

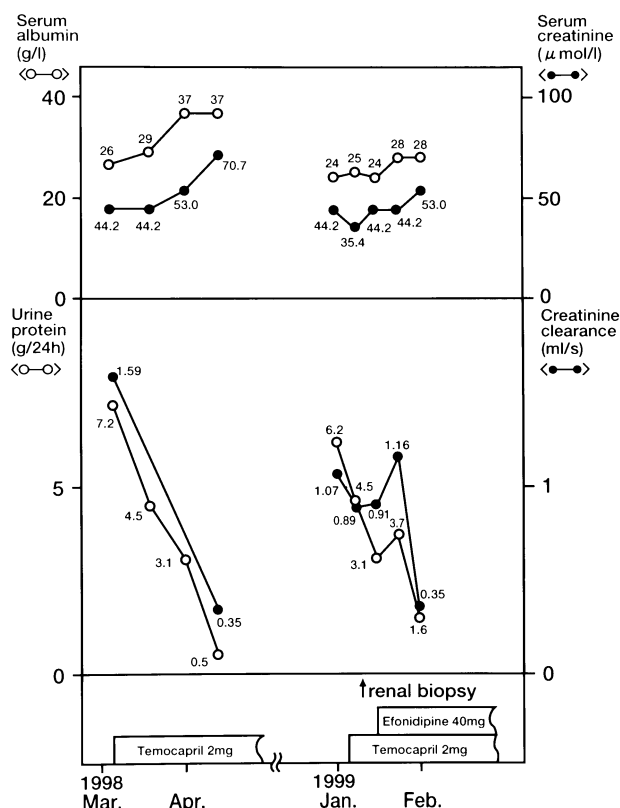

**Figure 1**—Clinical course of the patient.

patient's 24-h urinary protein excretion declined markedly to 0.5 g within 2 weeks (Fig. 1). Blood pressure and serum albumin levels also improved to 130/70 mmHg and 37 g/l, respectively. The patient was followed at the outpatient clinic after discharge from the hospital. However, in May 1998, she stopped coming to the clinic and discontinued all of her medications.

The patient, however, apparently remained well until December 1998 when she developed leg edema in association with an increase in body weight from 45 to 48 kg within a month. She was subsequently seen again at our hospital. Her blood pressure was 171/89 mmHg and urinalysis revealed 3+ proteinuria. Her chest X-ray revealed mild pleural effusions. An attempt to control her edema with a diuretic (furosemide 20 mg/day) as an outpatient was unsuccessful, and she began to experience dyspnea on exertion. She was, therefore, admitted to our hospital in January 1999. Her body weight was 52 kg and blood pressure was 160/83 mmHg on admission. Examination of the ocular fundi revealed microaneurysms and dot hemorrhages without exudates. There were signs of diabetic neuropathy, including decreased

vibratory sensation and an orthostatic drop of blood pressure. Laboratory studies revealed a postprandial plasma glucose level of 15.3 μmol/l, an HbA<sub>1c</sub> concentration of 6.2%, a serum creatinine level of 44.2 μmol/l, a serum albumin level of 24 g/l, and a serum cholesterol level of 4.89 μmol/l. The 24-h urinary excretion was 6.2 g and creatinine clearance was 1.07 ml/s. Chest X-rays showed moderate pleural effusions. Renal biopsy was performed in the hospital to clarify the etiology of repeated nephrotic-range proteinuria, with written informed consent from the patient. The specimen for light microscopy contained 9 glomeruli, of which 1 was globally sclerotic and the rest showed diffuse intercapillary glomerulosclerosis without cellular proliferation. More than half of the glomeruli contained lamellated argyrophil mesangial nodules. Occasional afferent arterioles showed hyalinosis, and mild tubular atrophy and interstitial fibrosis were present. Immunofluorescence revealed linear localization of IgG along the glomerular capillary walls. Electron microscopy showed a marked increase in the mesangial matrix in association with thickening of capillary basement membrane. Electron-

dense deposits were absent. The histological diagnosis based on these findings was diffuse and nodular diabetic glomerulosclerosis. Temocapril (2 mg/day) was re-started and the dose of furosemide was increased to 40 mg a day after renal biopsy. Efonidipine (Landel), 40 mg/day was added a few days later. Insulin therapy (4U with NPH insulin at breakfast) was used to control hyperglycemia for a week, and later replaced with gliclazide (40 mg/day). The 24-h urinary protein excretion declined again markedly to 1.6 g within a month after starting temocapril (Fig. 1). Pleural effusions and edema disappeared and her body weight decreased to 41 kg. Blood pressure and serum albumin levels also improved to 120/70 mmHg and 28 g/l respectively. A month after admission, she was asymptomatic and was discharged from the hospital.

It has long been thought that the appearance of persistent proteinuria heralds a progressive decline of renal function during the natural history of diabetic nephropathy, and that nephrotic-range proteinuria, in particular, points toward a poor renal prognosis (1). Meanwhile, many recent studies have demonstrated that antihypertensive therapy can slow the rate of decline of renal function in diabetic nephropathy. Furthermore, it was suggested in more recent studies that ACE inhibitors reduce proteinuria and protect renal function in patients with diabetic nephropathy more effectively than other antihypertensive agents, and that this renoprotective effect of ACE inhibitors is independent of changes in blood pressure (5). Some studies have shown that type 1 diabetic patients with nephrotic-range proteinuria can maintain stable renal function with a marked reduction of proteinuria on ACE inhibitors (2–4). Herbert et al. (2) reported that 7 of 42 (16.7%) type 1 diabetic patients with nephrotic-range proteinuria treated with captopril achieved remission of proteinuria and maintained stable renal function over a mean follow-up period of 3.4 years. Meanwhile, only 1 of 66 (1.5%) in the placebo group had a comparable clinical course. Gault and Fernandez (3) reported a type 1 diabetic patient in whom enalapril, started after 10 years of nephrotic-range proteinuria, resulted in stable renal function and disappearance of proteinuria. McGregor and Bailey (4) reported that treatment with captopril or enalapril in 2 type 1 diabetic patients with nephropathy resulted in sta-

ble renal function and remission of nephrotic-range proteinuria for over 11 years. In these 3 reports, nephrotic-range proteinuria disappeared gradually over a few years on ACE inhibitors. Moreover, these were all type 1 diabetic patients of relatively young age (~30 years old), in contrast to our patient.

We documented a 69-year-old type 2 diabetic woman with histologically proven diabetic nephropathy in whom rapid remission of nephrotic-range proteinuria was observed within a month on an ACE inhibitor, temocapril, on 2 separate occasions. As shown in Fig. 1, the reduction of proteinuria occurred in association with a decrease in creatinine clearance, although the magnitude of the former by far exceeded that of the latter. The mechanism of the reduction of glomerular proteinuria by ACE inhibitors is still disputed. Imanishi et al. (6) suggested that ACE inhibitors reduce albuminuria in diabetic nephropathy by decreasing the glomerular capillary pressure and improving hyperfiltration via efferent arteriolar dilatation. Meanwhile, other investigators have suggested improvement of size selectivity of the glomerular capillary membrane by ACE inhibitors (7). Whatever the mechanism involved, reduction of proteinuria by ACE inhibitors in patients with diabetic nephropathy is expected to have a beneficial effect on renal prognosis, since proteinuria itself is considered nephrotoxic and to be a promoter of progressive renal dysfunction (8). Our report, for the first time, demonstrated that an ACE inhibitor could exert a rapid beneficial effect on nephrotic syndrome due to diabetic nephropathy in an elderly patient with type 2 diabetes. Although the experience is limited to a single patient, it should be worth attempting to treat such patients with ACE inhibitors.

RYUJI SUZUKI, MD  
AKIRA SHIMADA, MD  
KONOSUKE KONISHI, MD  
TAKAO SARUTA, MD

From the Department of Internal Medicine, Keio University School of Medicine, Tokyo, Japan.

Address correspondence to Akira Shimada, MD, Department of Internal Medicine, Keio University School of Medicine, 35 Shinanomachi, Shinjuku-ku, Tokyo 160-8582, Japan. E-mail: n2518@med.keio.ac.jp.

## References

1. Austin SM, Lieberman JS, Newton LD, Mejia M, Peters WA, Myers BD: Slope of

serial glomerular filtration rate and the progression of diabetic glomerular disease. *J Am Soc Nephrol* 3:1358–1370, 1993

2. Herbert LA, Bain RP, Verme D, Cattran D, Whittier FC, Tolchin N, Rohde RD, Lewis EJ: Remission of nephrotic range proteinuria in type 1 diabetes. *Kidney Int* 46:1688–1693, 1994
3. Gault HM, Fernandez D: Stable renal function in insulin-dependent diabetes mellitus 10 years after nephrotic range proteinuria. *Nephron* 72:86–92, 1996
4. McGregor D, Bailey RR: Over 11 years of stable renal function after remission of nephrotic-range proteinuria in type 1 diabetes treated with an ACE inhibitor. *Nephron* 76:270–275, 1997
5. Lewis EJ, Hunsicker LG, Bain RP, Rohde RD: The effect of angiotensin-converting-enzyme inhibition on diabetic nephropathy: the Collaborative Study Group. *N Engl J Med* 329:1456–1462, 1993
6. Imanishi M, Yoshioka K, Okumura M, Konishi Y, Tanaka S, Fujii S, Kimura G: Mechanism of decreased albuminuria caused by angiotensin converting enzyme inhibitor in early diabetic nephropathy. *Kidney Int* 52 (Suppl. 63):198–200, 1997
7. Rumuzzi A, Ruggenenti P, Mosconi L, Pata V, Viberti G, Remuzzi G: Effect of low-dose enalapril on glomerular size-selectivity in human diabetic nephropathy. *J Nephrol* 6: 36–43, 1993
8. Remuzzi G, Bertani T: Is glomerulosclerosis a consequence of altered glomerular permeability to macromolecules? *Kidney Int* 38:384–394, 1990

## Interesting Insulin Response to Oral Glucose Load in Young Japanese Subjects With Impaired Glucose Tolerance

We recently reported that the degree of insulin response in Japanese subjects with impaired glucose tolerance (IGT) and diabetes to 75-g oral glucose load (1) is much lower than that in Caucasian subjects (2,3). Japanese-American IGT or diabetic subjects in Hawaii and Seattle, Washington, however, showed much higher insulin resistance and compensatory hyper-response to insulin secretion than native Japanese subjects. This suggests that environmental factors of lifestyle, such as a high-fat and high-protein diet and/or less exercise, may deterio-

rate insulin sensitivity and strengthen the potency of insulin secretion even in those with the same genetic background (4,5). In Japan, the increase in personal cars and traffic networks has mushroomed since the late 1960s. Transportation and a Westernized diet, including high fat and animal protein, have combined to affect the entire population of Japan. Younger Japanese, born during or after the 1960s, grew up with a Westernized lifestyle, and we hypothesize that continuous exposure to such environmental factors during growth may strengthen the potency of insulin secretion and promote compensatory hyperinsulin secretion in an insulin-resistant state after maturity. To certify our hypothesis, we compared the insulin response to an oral glucose load in younger Japanese adult IGT subjects (20–39 years) with that of subjects >40 years in a 75-g oral glucose tolerance test (OGTT).

A series of 2,142 Japanese subjects, 1,361 men and 781 women aged 20–82 years (mean: 56 years), suspected of having diabetes, underwent a 75-g OGTT (0–3 h) for diagnosis at Tokyo Saiseikai Central Hospital and Juntendo University Hospital from January 1996 to December 1998. They were divided into 3 groups using current World Health Organization criteria, and 831 subjects were diagnosed with IGT. The IGT subjects aged  $56 \pm 0.4$  (mean  $\pm$  SEM, M/F 521/310) were divided into 5 groups by age ( $\leq 39$ , 40–49, 50–59, 60–69, and  $\geq 70$  years) and compared with 3 insulin sensitivity and secretion parameters among age-groups. The homeostasis model assessment of insulin resistance (HOMA-IR), a marker of insulin resistance, was calculated as fasting plasma glucose (mg/dl)  $\times$  fasting plasma insulin ( $\mu$ U/ml)/405 converted from the original formula (6). The insulinogenic index (IsIx), a marker of early insulin secretion, was defined as  $\Delta$ insulin/ $\Delta$ PG, or  $(\text{Insulin}_{30} - \text{Insulin}_0)/(\text{PG}_{30} - \text{PG}_0)$  (7). The area under the insulin curve ( $\text{AUC}_{\text{ins}}$ ), a marker of total insulin secretion, was calculated as the total area under the insulin response curve during the 3-h OGTT.

Surprisingly, HOMA-IR, IsIx, and  $\text{AUC}_{\text{ins}}$  in the youngest age-group ( $\leq 39$  years), are all significantly and notably higher than in the other age-groups (Fig. 1). Although our study groups are not large and other clinical characteristics, such as family history of diabetes, BMI, lipid profiles, or blood pressure, were not evaluated, the result supports our hypothesis,

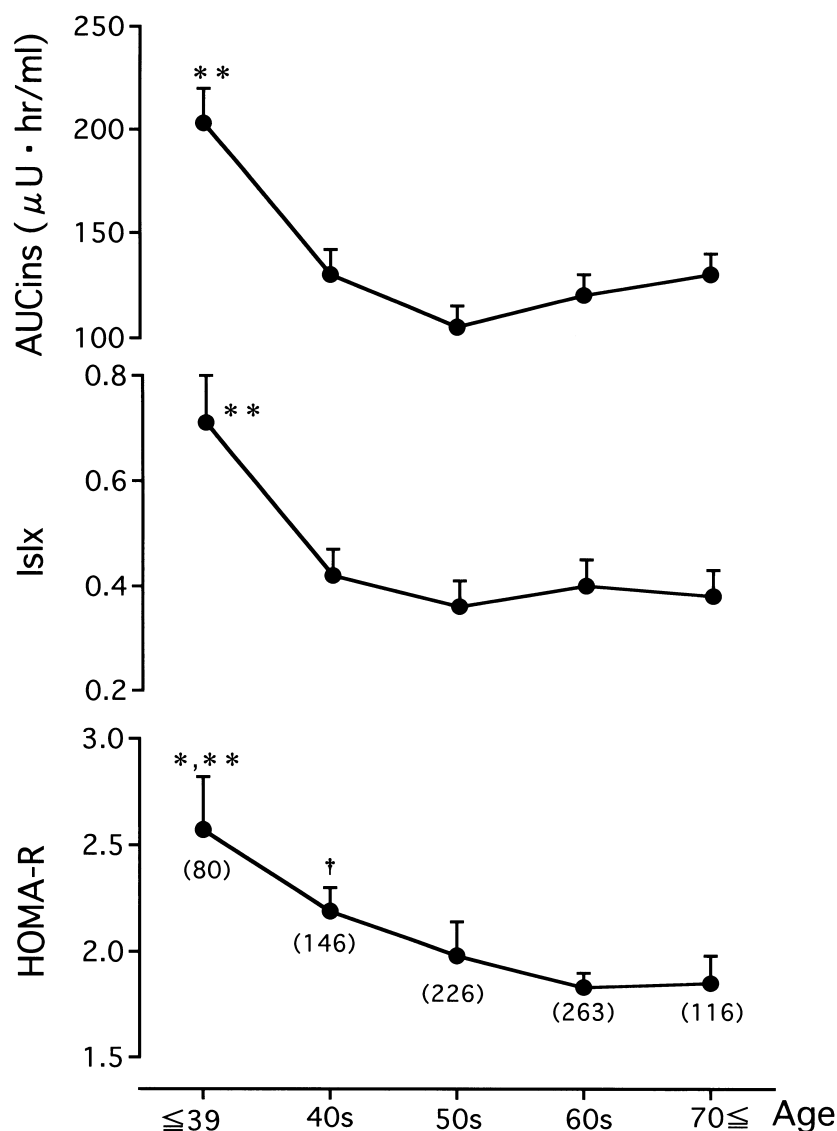

**Figure 1**—Clinical markers for insulin sensitivity and secretion during the 75-g OGTT in 831 Japanese subjects with IGT. Values are expressed as means  $\pm$  SEM. Numbers of subjects are shown in parentheses. \* $P < 0.05$  vs. the group aged 40–49 years; \*\* $P < 0.01$  vs. the group aged  $\geq 59$  years; † $P < 0.01$  vs. the group aged 60–69 years.

namely that the generation of Japanese IGT subjects  $\leq 39$  years of age, as compared with older subjects, have a strong potential of insulin secretion under an insulin-resistant state. It has been assumed that Japanese subjects develop overt diabetes from IGT much earlier than Caucasian subjects because of exposure to factors causing insulin resistance, such as obesity, less exercise, or excessive stress. This may be the result of Japanese subjects having weaker potency of insulin secretion and maximal compensatory hypersecretion of insulin that are less than those of

Caucasians and Japanese-Americans. Although the present study is preliminary, results suggest that the number of Japanese IGT subjects retaining long-term IGT through strong insulin secretion will increase. The results further suggest that the development of insulin resistance and compensatory hyperinsulinemia-related atherosclerotic disease, observed in syndrome X (8) or insulin resistance syndrome (9) of Caucasians, will also increase in Japan in the near future. We must, therefore, start further large-scale epidemiological studies focusing on the develop-

ment of both diabetes and atherosclerosis from IGT in young subjects. It should be of great interest to determine whether and how the Westernized lifestyle during growth may upregulate pancreatic  $\beta$ -cell growth or function and affect the potency of insulin secretion in adults. We view this as a very important research direction in the etiology of diabetes and atherosclerosis in Japan and other rapidly developing and Westernized countries.

YASUSHI TANAKA, MD  
YOSHIHITO ATSUMI, MD  
KENPEI MATSUOKA, MD  
TOMIO ONUMA, MD  
RYUZO KAWAMORI, MD

From the Department of Medicine (Y.T., T.O., R.K.) Metabolism and Endocrinology, School of Medicine, Juntendo University; and the Department of Medicine (Y.A., K.M.), Tokyo Saiseikai Central Hospital, Tokyo, Japan.

Address correspondence to Yasushi Tanaka, MD, Department of Medicine, Metabolism and Endocrinology, School of Medicine, Juntendo University, 2-1-1, Hongo, Bunkyo-ku, Tokyo 113-8421 Japan. E-mail: y-tanaka@med.juntendo.ac.jp.

## References

1. Tanaka Y, Atsumi Y, Asahina T, Hosokawa K, Matsuoka K, Kinoshita J, Onuma T, Kawamori R: Usefulness of revised fasting plasma glucose criterion and characteristics of the insulin response to an oral glucose load in newly diagnosed Japanese diabetic subjects. *Diabetes Care* 21:1133–1137, 1998
2. DeFronzo RA: The triumvirate:  $\beta$ -cell, muscle, liver: a collusion responsible for NIDDM. *Diabetes* 37:667–687, 1988
3. DeFronzo RA: Pathogenesis of type 2 (non-insulin dependent) diabetes: a balanced overview. *Diabetologia* 35:389–397, 1992
4. Hara H, Egusa G, Yamakido M, Kawate R: The high prevalence of diabetes mellitus and hyperinsulinemia among Japanese-Americans living in Hawaii and Los Angeles. *Diabetes Res Clin Pract* 24:S37–S42, 1994
5. Fujimoto WY, Leonetti DL, Kinyoun JL, Newell-Morris L, Shuman WP, Stolov WC, Wahl PW: Prevalence of diabetes mellitus and impaired glucose tolerance among second-generation Japanese-American men. *Diabetes* 36:721–729, 1987
6. Matthews DR, Hosker JP, Rudenski AS, Naylor BA, Treacher DF, Turner RC: Homeostasis model assessment: insulin resistance and  $\beta$ -cell function from fasting plasma glucose and insulin concentrations in man. *Diabetologia* 28:412–419, 1985
7. Kosaka K, Kuzuya T, Yoshinaga H, Hagura R: A prospective study of health check

examinees for the development of non-insulin-dependent diabetes mellitus: relationship of the incidence of diabetes with the initial insulinogenic index and degree of obesity. *Diabet Med* 13 (Suppl. 6):S120–S126, 1996

8. Reaven GM, Laws A: Insulin resistance, compensatory insulinemia, and coronary heart disease. *Diabetologia* 37:948–952, 1994
9. DeFronzo RA, Ferannini E: Insulin resistance: a multifocal syndrome responsible for NIDDM, obesity, hypertension, dyslipidemia, and atherosclerotic cardiovascular disease. *Diabetes Care* 14:173–194, 1991

## COMMENTS AND RESPONSES

### An Equation for Insulin Sensitivity Index

Matsuda and DeFronzo (1) presented a novel method of estimating insulin sensitivity from data obtained by an oral glucose tolerance test. They correlated the values thus obtained with values from the same subjects with the euglycemic clamp technique. The results are significant, and the effort is commendable. To stimulate further discussion, I would like to proffer the following questions:

In the study, fasting plasma glucose (FPG) and glucose (G) are expressed in mg/dl, and fasting plasma insulin (FPI) and insulin (I) are expressed in  $\mu$ l/ml. In a biological system, the action of insulin on glucose proceeds at the molecular level. Will it, then, be more consistent to express FPG and G in  $M^{-3}/l$ , and FPI and I in  $M^{-12}/l$ ?

The composite equation for the insulin sensitivity index (ISI) states that

$$ISI = 10,000/\sqrt{(FPG \times FPI) \times (\bar{G} \times \bar{I})}$$

For simplicity, let us assume that  $\bar{G}$  approaches FPG and that  $\bar{I}$  approaches FPI. The equation then simplifies to

$$ISI = 10,000/\sqrt{(FPG^2 \times FPI^2)}$$

$$10,000/(FPG \times FPI)$$

This means that the ISI is inversely proportional to FPG and to FPI. Are these

proportionalities linear, logarithmic, or otherwise? The study presupposes that they are linear. Is there any theoretical justification for this supposition?

JOSE S. CHENG, MD

From the Department of Family and Community Medicine, Baylor College of Medicine, Houston, Texas.

Address correspondence to Jose S. Cheng, MD, 3825 Tennyson St., Houston, TX 77005-2851. E-mail: jcheng@bcm.tmc.edu.

#### References

1. Matsuda M, DeFronzo R: Insulin sensitivity indices obtained from oral glucose tolerance testing: comparison with the euglycemic insulin clamp. *Diabetes Care* 22: 1462–1470, 1999

### Response to Cheng

In response to Dr. Cheng (1), it should be noted that expressing the units of glucose and insulin as mmol/l and pmol/l, respectively (instead of mg/dl and  $\mu$ U/ml), will not change any of the observed correlations.

As we described (2), the simplified equation for the insulin sensitivity index (ISI) [ $ISI = 10,000/(FPG \times FPI)$ ] cited in Dr. Cheng's letter is mathematically equivalent to the inverse of the reduced homeostasis model assessment formula, in which  $k = 10,000$ .

We examined the relationship between our proposed ISI and the measurement of insulin sensitivity obtained from the euglycemic insulin clamp by use of both the log of the insulin concentration ( $r = 0.69$  and  $P < 0.0001$ ) and the absolute plasma insulin concentration ( $r = 0.73$  and  $P < 0.0001$ ). The correlation coefficients were quite similar.

RALPH A. DEFONZO, MD

From the Diabetes Division, Department of Medicine, University of Texas Health Science Center at San Antonio, San Antonio, Texas.

Address correspondence to Ralph A. DeFronzo, MD, Professor of Medicine, University of Texas Health Science Center at San Antonio, Diabetes Division, Department of Medicine, 7703 Floyd Curl Dr., San Antonio, TX 78284-7886. E-mail: defronzo@uthscsa.edu.

#### References

1. Cheng JS: An equation for insulin sensitivity index (Letter). *Diabetes Care* 23:712,

2000

2. Matsuda M, DeFronzo R: Insulin sensitivity indices obtained from oral glucose tolerance testing. *Diabetes Care* 22:1462–1470, 1999

### Effect of Gluten-Free Diet on the Metabolic Control of Type 1 Diabetes in Patients With Diabetes and Celiac Disease

Previously (1), we described an increased frequency of hypoglycemic episodes with a reduction in insulin requirement as a presenting sign of celiac disease in children with type 1 diabetes. In a study conducted at a different center in Italy, similar data were observed: 6 well-controlled patients (mean GHb value  $8.7 \pm 2.2\%$ ) had significantly more hypoglycemic episodes before diagnosis of celiac disease when compared with 12 well-matched diabetic patients without celiac disease ( $4.3 \pm 2.0$  vs.  $1.5 \pm 2.4$  episodes/week, respectively). This difference persisted up to 6 months after initiation of a gluten-free diet ( $6.6 \pm 6.2$  vs.  $1.8 \pm 4.2$  episodes/week) (EC., personal communication).

In contrast, Kaukinen et al. (2) failed to find an impact on metabolic control in adult patients with type 1 diabetes and celiac disease when a gluten-free diet was inadequate. It is worth noting that the mean GHb value in these patients ranged from 9.8 to 10% during the 3 years preceding the diagnosis of celiac disease and remained substantially unchanged (9.5–10.3%) during the year after the initiation of a gluten-free diet. Similarly, the average daily insulin dosage (0.6 U/kg) remained unchanged after the start of a gluten-free diet. In our patients, the mean GHb value was  $7.1 \pm 1.1\%$  at the time of diagnosis of celiac disease; the mean insulin requirement was 0.6 U/kg body weight. This requirement was the mean final result of a progressive reduction of the dose ranging from –30 to –60% in individuals due to symptomatic and asymptomatic hypoglycemic episodes.

Thus, the lack of hypoglycemic episodes at the clinical onset of celiac diseases in the patients described by Kaukinen et al. (2) could be the result of a higher mean blood glucose level as com-

pared with our patients who received an intensified therapy and had a better metabolic control (as determined by GHb values). In patients maintained at a strict metabolism (as our patients are), hypoglycemic crisis and a reduction of insulin requirement may more easily manifest as signs of celiac disease.

**DARIO IAFUSCO, MD**  
**FRANCESCO REA, MD, PH**  
**FRANCESCO CHIARELLI, MD, PH**  
**ANGELIKA MOHN, MD**  
**FRANCESCO PRISCO, MD, PH**

From the Department of Pediatrics (D.I., F.R., F.P.), Second University of Naples, Naples; and the Department of Pediatrics (F.C., A.M.), University of Chieti, Chieti, Italy.

Address correspondence to Dario Iafusco, MD, Department of Pediatrics, Second University of Naples, Via S. Andrea delle Dame n. 4, 80138 Naples, Italy. E-mail: dario.iafusco@unina2.it.

## References

1. Iafusco D, Rea F, Prisco F: Hypoglycemia and reduction of the insulin requirement as a sign of celiac disease in children with IDDM (Letter). *Diabetes Care* 21:1379-1380, 1998
2. Kaukinen K, Salmi J, Lahtela J, Siljamäki-Ojansuu U, Koivisto A-M, Oksa H, Collin P: No effect of gluten-free diet on the metabolic control of type 1 diabetes in patients with diabetes and celiac disease (Letter). *Diabetes Care* 22:1747-1748, 1999

## Response to Iafusco et al.

### Effect of gluten-free diet on the metabolic control of type 1 diabetes in patients with diabetes and celiac disease

The letter of Iafusco et al. (1) suggests that the lack of hypoglycemic episodes in patients with celiac disease and diabetes might be a consequence of poor glycemic control. Evidence shows that the risk for hypoglycemia is increased when the HbA<sub>1c</sub> percentage is low (2). This phenomenon may indeed explain why this complication was rarely observed in our series, in which the mean HbA<sub>1c</sub> value of our patients varied from 8.5 to 10%. However, we must also emphasize that our untreated celiac disease patients

were generally in good condition; most of them had only vague, if any, symptoms of celiac disease. More than likely, the risk of hypoglycemia will be considerably greater in patients suffering from a severe malabsorption. The risk may further differ between adults and children who have both celiac disease and diabetes.

The low frequency of hypoglycemic episodes does not refute our conclusion that a gluten-free diet has no influence on the metabolic control of diabetes. Nevertheless, we fully agree that, in some cases, hypoglycemia can be due to untreated celiac disease. Celiac disease should be considered in type 1 diabetes patients who frequently experience hypoglycemic events. Furthermore, whenever the metabolic control is poor in patients with concomitant diabetes and celiac disease, other autoimmune conditions should be considered. The coexistence of celiac disease, type 1 diabetes, and autoimmune thyroid disease or Addison's disease is not uncommon (3).

On the other hand, it is worth noting that in the series of Chiarelli (1), hypoglycemic events were even more frequent in celiac patients who had maintained a gluten-free diet for 6 months than they were before the start of the diet (6.6 and 4.3 episodes on average, respectively). This observation, we feel, supports our conclusion that gluten-free diet has, by and large, little if any effect on the metabolic control of diabetes.

Restricting celiac screening to diabetic patients who suffer from hypoglycemic complications means that most cases would remain undetected. According to several reports, the prevalence of celiac disease in type 1 diabetes is as high as 2-7%. Endomysial (4) and tissue transglutaminase (5,6) antibody assays are highly specific tests and are sensitive enough to effectively screen for celiac disease. Therefore, it is now feasible to screen all patients with type 1 diabetes for celiac disease; this has been our practice for more than 10 years.

We have not carried out active screening only to improve the metabolic control of diabetes. We consider that our screening policy is further justified for other reasons. First, the aim is to treat celiac disease before overt malabsorption develops. Second, osteopenia is a problem in both diabetes (7) and celiac disease (8). A low bone mineral density can improve even in asymptomatic celiac patients when they are placed on a gluten-free diet (9).

A gluten-free diet may be difficult to maintain for diabetic patients. Prospective studies are warranted to evaluate the quality of life before and after the treatment of celiac disease in individuals with concomitant type 1 diabetes.

**KATRI KAUKINEN, MD**  
**JORMA SALMI, MD**  
**JORMA LAHTELA, MD**  
**HEIKKI OKSA, MD**  
**PEKKA COLLIN, MD**

From the Department of Internal Medicine, Tampere University Hospital and Medical School, University of Tampere, Tampere, Finland.

Address correspondence to Pekka Collin, MD, Medical School, University of Tampere, P.O. Box 607, FIN-33101 Tampere, Finland. E-mail: pekka.collin@uta.fi.

## References

1. Iafusco D, Rea F, Chiarelli F, Mohn A, Prisco F: Effect of gluten-free diet on the metabolic control of type 1 diabetes in patients with diabetes and celiac disease (Letter). *Diabetes Care* 23:712-713, 2000
2. The Diabetes Control and Complications Trial Research Group: Hypoglycemia in the Diabetes Control and Complications trial. *Diabetes* 46:271-286, 1997
3. Kaukinen K, Collin P, Mykkänen A-H, Paronen J, Mäki M, Salmi J: Celiac disease and autoimmune endocrinologic disorders. *Dig Dis Sci* 44:1428-1433, 1999
4. Ladinser B, Rossipal E, Pittschieler K: Endomysium antibodies in coeliac disease: an improved method. *Gut* 35:776-778, 1994
5. Dieterich W, Laag E, Schopper H, Volta U, Ferguson A, Gillett H, Riecken EO, Schuppan D: Autoantibodies to tissue transglutaminase as predictors of celiac disease. *Gastroenterology* 115:1317-1321, 1998
6. Sulkanen S, Halttunen T, Laurila K, Kolho K-L, Korponay-Szabo I, Sarnesto A, Savilahti E, Collin P, Mäki M: Tissue transglutaminase autoantibody enzyme-linked immunosorbent assay in detecting celiac disease. *Gastroenterology* 115:1322-1328, 1998
7. Selby PL: Osteopenia and diabetes. *Diabet Med* 5:423-428, 1988
8. Corazza GR, Di Sario A, Cecchetti L, Tarozzi C, Corrao G, Bernardi M, Gasbarrini G: Bone mass and metabolism in patients with celiac disease. *Gastroenterology* 109:122-128, 1995
9. Mustalahti K, Collin P, Sievänen H, Salmi J, Mäki M: Osteopenia in patients with clinically silent coeliac disease warrants screening. *Lancet* 354:744-745, 1999



## Prediction of Albumin Excretion Rate From Albumin-to-Creatinine Ratio

Two recent articles in *Diabetes Care* have continued the long-running debate about methods of screening for albuminuria in diabetes (1,2). The crux of this issue is whether the information that can be obtained from spot urine samples (either albumin concentration or the albumin-to-creatinine ratio) can provide equivalent information to a timed albumin excretion rate, on which our current definitions of albuminuria are based. Spot samples have the huge advantage of not requiring accuracy of either timing or volume measurement, both of which are potent sources of patient dissatisfaction and error in clinical practice.

Harvey et al. (1) and Bakker (2) have estimated cutoff values for albumin-to-creatinine ratios that predict values for the albumin excretion rate. Both have emphasized that values discriminating between normal and abnormal albuminuria are dependent on age and sex (1,2). Even though this approach is useful, it is worth remembering an alternative method that was first suggested by Ginsberg et al. (3) in 1983. The daily urine creatinine excretion, which is relatively constant, can be estimated from the Cockcroft-Gault formula, which takes into account age, sex, and body size (4). The formula is as follows: creatinine excretion (mmol/day) =  $[(140 - \text{age}) \cdot \text{weight (kg)}] / k$ , where  $k = 665$  for men and  $782$  for women. The estimated urine creatinine multiplied by the albumin-to-creatinine ratio gives an estimate of 24-h urine albumin excretion.

In 1992, we published data on the agreement between the albumin excretion rate estimated in this way from spot samples and the albumin excretion rate measured by 24-h urine collections and on the agreement between repeated 24-h urine collections (5). We demonstrated that the estimate gave numerically similar values to the measured samples with a degree of agreement similar to that found between timed collections. The errors inherent in the estimates were trivial compared with the day-to-day variability in albumin excretion (5). This simple device deserves wider appreciation.

TIM CUNDY, MD  
JOHN BAKER, MD

From the Department of Medicine, University of Auckland, Auckland, New Zealand.

Address correspondence to Tim Cundy, MD, Department of Medicine, Auckland Hospital, Private Bag 92-019, Auckland 1, New Zealand. E-mail: t.cundy@auckland.ac.nz.

### References

1. Harvey JN, Hook K, Platts JK, Devarajoo S, Meadows PA: Prediction of albumin excretion rate from albumin-to-creatinine ratio (Letter). *Diabetes Care* 22:1597-1598, 1999
2. Bakker AJ: Detection of microalbuminuria: receiver operating characteristic curve analysis favors albumin-to-creatinine ratio over albumin concentration. *Diabetes Care* 22:307-313, 1999
3. Ginsberg JM, Chang BS, Matarese RA, Garella S: Use of single-voided urine samples to estimate quantitative proteinuria. *N Engl J Med* 309:1543-1546, 1983
4. Cockcroft DW, Gault MH: Prediction of creatinine clearance from serum creatinine. *Nephron* 16:31-41, 1976
5. Cundy TF, Nixon D, Berkahn L, Baker J: Measuring the albumin excretion rate: agreement between methods and biological variability. *Diabet Med* 9:138-143, 1992

## Response to Cundy and Baker

The methodology recommended by Cundy and Baker (2) is a useful means of estimating 24-h urinary albumin excretion rates from the albumin-to-creatinine ratio (ACR). Such a methodology uses the Cockcroft-Gault equation to factor age, sex, and body weight into account (1,2). The diagnostic values of the ACR, as it is commonly used in current methodologies, incorporate only the effect of sex. Cundy and Baker's recommendation is useful for the comparison of ACR values with 24-h urinary albumin values, but in Europe in recent years, we have moved toward timed overnight collections as the gold standard in the assessment of diabetic proteinuria, because posture and activity are controlled for and collection is simplified for the patient. The Cockcroft-Gault equation, as currently validated, does not allow calculation of the overnight albumin excretion rate from the ACR (3). In general clinical practice, a decision on whether the result indicates normal albumin excretion, microalbuminuria, or established nephropathy is all that is required.

For this purpose, the cutoff values that we derived are satisfactory (4). They generally provide a clear distinction of microalbuminuria from normal, because the diagnostic values are far removed from the normal population mean (5).

We found that the ACR had less within-subject variation than timed overnight measurements (4). For this reason, coupled with its simplicity, we feel that the use of single samples with or without the conversion to 24-h albumin excretion rates, as advocated by Cundy and Baker, is preferable for large surveys and routine clinical use.

JOHN N. HARVEY, MD

From the University of Wales College of Medicine, Wrexham Academic Unit, Wrexham, U.K.

Address correspondence to John N. Harvey, MD, Diabetes Unit, Gladstone Centre, Maelor Hospital, Croesnewydd Road, Wrexham Clwyd LL13 7TD, U.K. E-mail: john.harvey@new-tr.wales.nhs.uk.

### References

1. Cundy T, Nixon D, Berkahn L, Baker I: Measuring the albumin excretion rate: agreement between methods and biological variability. *Diabet Med* 9:138-143, 1992
2. Cundy T, Baker I: Prediction of albumin excretion rate from albumin-to-creatinine ratio (Letter). *Diabetes Care* 23:714, 2000
3. Cockcroft DS, Gault MH: Prediction of creatinine clearance from serum creatinine. *Nephron* 16:31-41, 1976
4. Harvey JN, Hood K, Platts JK, Devarajoo S, Meadows PA: Prediction of albumin excretion rate from albumin-to-creatinine ratio. *Diabetes Care* 22:1597-1598, 1999
5. Watts GF, Morris RW, Khan K, Polak A: Urinary albumin excretion in healthy adult subjects: reference values and some factors affecting their interpretation. *Clin Chim Acta* 172:191-198, 1988

## Is There Any Use for the Oral Glucose Tolerance Test?

In relation to the ongoing debate on the new diagnostic criteria, we appreciated the balanced view of Dr. Perry (1), expressed in a letter published in a recent issue of this journal. The author quite correctly states that merits and limits are built into any screening method and warns against sterile discussions about the need for a compromise between the pragmatic

and the ideal. One should bear in mind that the main objective should be to ensure that people with abnormal glucose homeostasis are detected in the community. To serve this purpose, the author suggests that the best compromise is a screening approach based on the measurement of fasting glucose combined with the oral glucose tolerance test (OGTT) in those with abnormal fasting values. We largely share the view of a need for a compromise, as the OGTT is little used by clinicians and may be unfeasible in many contexts as a screening test on a population basis. However, we would like to comment on the suggested approach.

In relation to the diagnosis of diabetes, there is mounting evidence that there is a sizeable proportion of previously undiagnosed diabetic people with a postload glucose  $\geq 11.1$  mmol/l (200 mg/dl) and fasting plasma glucose  $< 7.0$  mmol/l (126 mg/dl). This proportion varies in different populations and ranges from 32 to 72% (2–4). Furthermore, in a pooled analysis of 20 studies conducted in different European countries, as many as 31% of those who are diabetic, according to postchallenge plasma glucose, have normal fasting values ( $< 6.1$  mmol/l, 110 mg/dl) (4) and, therefore, would not be detected by a screening procedure based essentially on fasting glucose measurements. In addition, fasting glucose is of little help in diagnosing impaired glucose intolerance (IGT). Evidence is accumulating that most people with IGT, from 54 to 67%, have fasting glucose in the normal range ( $< 6.1$  mmol/l, 110 mg/dl) (4–6). It has also become clear that isolated postload hyperglycemia is a strong predictor of mortality (2,7,8). Furthermore, we have shown that in Caucasians, IGT is a strong predictor of progression to diabetes (5), and similar data were produced in other ethnic groups (6).

Moreover, the suggested 2-step approach has been mimicked through the use of pooled data from 20 studies conducted in

various European countries. These data clearly show that a fasting glucose of 5.5 mmol/l, a value well within the normal range, is to be used as the threshold for proposing OGTT to detect 93% of all those with diabetes diagnosed on the basis of postload values. However, even with the use of this low threshold, the ability for fasting glucose levels to identify IGT does not improve substantially. Therefore, performing OGTT on people with abnormal fasting glucose would discriminate between diabetes and impaired fasting glucose, but will be of little help in identifying IGT; this is not of minor importance, because prevention of progression to overt diabetes in this group seems to be possible.

To preliminarily explore alternative strategies, we analyzed data relative to an occupational group of employees of the Italian telephone company ( $n = 1,038$ ) screened by OGTT in 1980, in whom major cardiovascular risk factors were also measured (9). Of the 68 participants with postload glucose in the IGT range, 58 (i.e., 85%) clustered in the group of people with at least 1 among the following conditions: BMI  $> 28$ , fasting triglycerides  $> 180$ , blood pressure  $> 140/90$ , or on current treatment for hypertension or hypertriglyceridemia. We, therefore, suggest that as a possible compromise between the pragmatic and the ideal, the OGTT could be used, irrespective of fasting glucose levels, for selective screenings of high-risk groups (i.e., those with 1 or more of the features of the metabolic syndrome: hypertension, hypertriglyceridemia, low HDL cholesterol, obesity/large waist circumference, and/or positive first-degree family history of diabetes).

OLGA VACCARO, MD  
GIANLUCA RUFFA, MD  
GABRIELE RICCARDI, MD

From the Department of Clinical and Experimental Medicine, Federico II University, Naples, Italy.

Address correspondence to Olga Vaccaro, MD, Department of Clinical and Experimental Medicine, II Policlinico, via S. Pansini 5, 80131 Naples, Italy. E-mail: scalaros@unina.it.

## References

1. Perry RC: Impaired fasting glucose and cardiovascular disease (Letter). *Diabetes Care* 22:1919–1920, 1999
2. Barrett-Connor E, Ferrara A: Isolated postchallenge hyperglycemia and the risk of fatal cardiovascular disease in older women and men: the Rancho Bernardo Study. *Diabetes Care* 21:1236–1239, 1998
3. Shaw JE, de Courten M, Boyko EJ, Zimmet PZ: Impact of new diagnostic criteria for diabetes on different populations. *Diabetes Care* 22:762–766, 1999
4. The DECODE Study Group on behalf of the European Diabetes Epidemiology Group: Is fasting glucose sufficient to define diabetes? Epidemiological data from 20 European studies. *Diabetologia* 42:647–654, 1999
5. Vaccaro O, Ruffa G, Imperatore G, Iovino V, Rivellese AA, Riccardi G: Risk of diabetes in the new diagnostic category of impaired fasting glucose. *Diabetes Care* 22:1490–1493, 1999
6. Shaw JE, Zimmet PZ, De Courten M, Dowse GK, Chitson P, Garebo H, Hemra F, Fareed D, Tuomilehto J, Alberti KG: Impaired fasting glucose or impaired glucose tolerance? *Diabetes Care* 22:399–402, 1999
7. The DECODE Study Group on behalf of the European Diabetes Epidemiology Group: Glucose tolerance and mortality: comparison of WHO and American Diabetes Association diagnostic criteria. *Lancet* 354:617–621, 1999
8. Shaw JE, Hodge AM, de Courten M, Chitson P, Zimmet PZ: Isolated post-challenge hyperglycemia confirmed as a risk factor for mortality. *Diabetologia* 42:1050–1054, 1999
9. Vaccaro O, Rivellese A, Riccardi G, Capaldo B, Tutino L, Annuzzi G, Mancini M: Impaired glucose tolerance and risk factors for atherosclerosis. *Arteriosclerosis* 4:592–597, 1984
